# Supplementary material for: Assessment of heat tolerance and identification of miRNAs during high-temperature response in grapevine
Source: Frontiers journal article supplement (doi:10.3389/fpls.2024.1484892), 2024-10-22
Supplement: Data_Sheet_1.zip [file Supplemental Table S6-Table S11.xlsx]

## Sheet: Supplementary Table S6
Supplementary Table S6. Summary of miRNA family statistics
family_ID	family_AC	mature_miRNA_count	mature_miRNA_percentage	total_reads	total_reads_percentage
undef	MIMAT0046334	525	0.294778	694553	0.404814
NA	NA	665	0.373386	46791	0.0272717
MIR166	MIMAT0015321	45	0.0252667	433314	0.252553
MIR162_2	MIMAT0015147	4	0.00224593	159644	0.0930471
MIR159	MIMAT0015183	41	0.0230208	108214	0.0630715
MIR156	MIMAT0013973	29	0.016283	103890	0.0605513
MIR482	MIMAT0015361	42	0.0235823	72545	0.0422822
MIR396	MIMAT0014017	28	0.0157215	40438	0.0235689
MIR167_2	MIMAT0001723	11	0.0061763	11616	0.00677028
MIR398_2	MIMAT0015355	4	0.00224593	8122	0.00473383
MIR167_1	MIMAT0013987	17	0.0095452	5281	0.00307798
MIR168	MIMAT0001727	9	0.00505334	4809	0.00280288
MIR535	MIMAT0005738	8	0.00449186	4066	0.00236983
MIR408_2	MIMAT0041017	4	0.00224593	2956	0.00172288
MIR858	MIMAT0031567	5	0.00280741	2752	0.00160398
MIR403	MIMAT0006574	7	0.00393038	2720	0.00158533
MIR827_3	MIMAT0018485	1	0.000561482	2480	0.00144545
MIR2950	MIMAT0018009	2	0.00112297	1978	0.00115286
MIR3627	MIMAT0018017	2	0.00112297	1767	0.00102988
MIR164	MIMAT0013985	11	0.0061763	1068	0.000622474
MIR171_2	MIMAT0015205	9	0.00505334	781	0.000455199
MIR477	MIMAT0018025	8	0.00449186	717	0.000417897
MIR169_4	MIMAT0001736	1	0.000561482	634	0.000369521
MIR160	MIMAT0013981	9	0.00505334	548	0.000319397
MIR6476	MIMAT0030369	1	0.000561482	388	0.000226142
MIR827_4	MIMAT0042010	2	0.00112297	374	0.000217983
MIR398	MIMAT0006564	11	0.0061763	373	0.0002174
MIR391	MIMAT0041043	5	0.00280741	337	0.000196417
MIR164_2	MIMAT0044698	4	0.00224593	313	0.000182429
MIR169_2	MIMAT0013994	7	0.00393038	286	0.000166693
MIR390	MIMAT0014033	4	0.00224593	215	0.000125311
MIR395	MIMAT0015348	8	0.00449186	182	0.000106077
MIR2111	MIMAT0016364	3	0.00168445	178	0.000103746
MIR393	MIMAT0014000	6	0.00336889	178	0.000103746
MIR3631	MIMAT0018034	3	0.00168445	157	9.1506e-05
MIR2119	MIMAT0011174	2	0.00112297	101	5.88669e-05
MIR394	MIMAT0001697	3	0.00168445	82	4.7793e-05
MIR162_1	MIMAT0005657	4	0.00224593	72	4.19645e-05
MIR169_6	MIMAT0001971	2	0.00112297	69	4.0216e-05
MIR2871	MIMAT0037363	1	0.000561482	66	3.84675e-05
MIR397	MIMAT0014019	5	0.00280741	64	3.73018e-05
MIR2118	MIMAT0011766	6	0.00336889	62	3.61361e-05
MIR319	MIMAT0006556	3	0.00168445	48	2.79764e-05
MIR399	MIMAT0015359	8	0.00449186	43	2.50622e-05
MIR1536	MIMAT0021219	1	0.000561482	41	2.38965e-05
MIR172	MIMAT0001742	7	0.00393038	31	1.80681e-05
MIR171_1	MIMAT0015332	8	0.00449186	17	9.9083e-06
MIR827_5	MIMAT0031272	1	0.000561482	16	9.32545e-06
MIR529	MIMAT0014030	3	0.00168445	11	6.41125e-06
MIR7492	MIMAT0034174	5	0.00280741	11	6.41125e-06
MIR530	MIMAT0020447	3	0.00168445	10	5.82841e-06
MIR408	MIMAT0015360	6	0.00336889	9	5.24557e-06
MIR5291	MIMAT0021356	1	0.000561482	9	5.24557e-06
MIR444	MIMAT0022262	3	0.00168445	8	4.66273e-06
MIR806	MIMAT0026335	1	0.000561482	8	4.66273e-06
MIR3932	MIMAT0032113	2	0.00112297	7	4.07989e-06
MIR6026	MIMAT0031164	1	0.000561482	6	3.49705e-06
MIR6450	MIMAT0025261	1	0.000561482	6	3.49705e-06
MIR9486	MIMAT0035497	1	0.000561482	6	3.49705e-06
MIR1063	MIMAT0005189	1	0.000561482	5	2.9142e-06
MIR5079	MIMAT0031376	1	0.000561482	5	2.9142e-06
MIR6201	MIMAT0036992	1	0.000561482	5	2.9142e-06
MIR827_2	MIMAT0020449	3	0.00168445	5	2.9142e-06
MIR902	MIMAT0005087	4	0.00224593	5	2.9142e-06
MIR1510	MIMAT0010040	3	0.00168445	4	2.33136e-06
MIR1511	MIMAT0031521	2	0.00112297	4	2.33136e-06
MIR2617	MIMAT0013335	1	0.000561482	4	2.33136e-06
MIR3630	MIMAT0018027	2	0.00112297	4	2.33136e-06
MIR4349	MIMAT0018285	1	0.000561482	4	2.33136e-06
MIR5268	MIMAT0021292	1	0.000561482	4	2.33136e-06
MIR7504	MIMAT0034072	3	0.00168445	4	2.33136e-06
MIR7836	MIMAT0030393	1	0.000561482	4	2.33136e-06
MIR8565	MIMAT0033881	3	0.00168445	4	2.33136e-06
MIR8674	MIMAT0034253	3	0.00168445	4	2.33136e-06
MIR898	MIMAT0004381	1	0.000561482	4	2.33136e-06
MIR169_1	MIMAT0013992	2	0.00112297	3	1.74852e-06
MIR1846	MIMAT0010042	1	0.000561482	3	1.74852e-06
MIR1861	MIMAT0031375	1	0.000561482	3	1.74852e-06
MIR1862	MIMAT0007833	1	0.000561482	3	1.74852e-06
MIR1882	MIMAT0007846	1	0.000561482	3	1.74852e-06
MIR2610	MIMAT0013319	1	0.000561482	3	1.74852e-06
MIR2873	MIMAT0023311	1	0.000561482	3	1.74852e-06
MIR4352	MIMAT0021618	2	0.00112297	3	1.74852e-06
MIR447	MIMAT0020346	2	0.00112297	3	1.74852e-06
MIR5020	MIMAT0022391	2	0.00112297	3	1.74852e-06
MIR5208	MIMAT0021315	1	0.000561482	3	1.74852e-06
MIR5274	MIMAT0022209	1	0.000561482	3	1.74852e-06
MIR528	MIMAT0014029	1	0.000561482	3	1.74852e-06

## Sheet: Supplementary Table S7
Supplementary Table S7. Read count statistics and TPM values of novel miRNAs
ID	CK-1.ReadsCount	CK-1.TPM	CK-2.ReadsCount	CK-2.TPM	CK-3.ReadsCount	CK-3.TPM	HT-1.ReadsCount	HT-1.TPM	HT-2.ReadsCount	HT-2.TPM	HT-3.ReadsCount	HT-3.TPM
vvi-m1820-5p	5088	478826	4396	484141	4047	432927	3133	423550	2882	383806	2049	375069
vvi-m1820-3p	3713	349426	3009	331388	3261	348845	3319	448695	3425	456119	2417	442431
vvi-m1784-3p	404	38020	366	40308.4	383	40971.3	39	5272.41	32	4261.55	16	2928.79
vvi-m2634-5p	242	22774.3	211	23237.9	336	35943.5	89	12031.9	82	10920.2	80	14644
vvi-m1276-5p	167	15716.2	161	17731.3	156	16688.1	124	16763.6	126	16779.9	101	18488
vvi-m1277-5p	167	15716.2	161	17731.3	156	16688.1	124	16763.6	126	16779.9	101	18488
vvi-m2826-5p	110	10352	95	10462.6	127	13585.8	67	9057.73	88	11719.3	83	15193.1
vvi-m1696-5p	64	6022.96	47	5176.21	71	7595.21	19	2568.61	30	3995.21	13	2379.64
vvi-m1784-5p	64	6022.96	47	5176.21	71	7595.21	19	2568.61	30	3995.21	13	2379.64
vvi-m1901-5p	64	6022.96	47	5176.21	71	7595.21	19	2568.61	30	3995.21	13	2379.64
vvi-m2394-5p	58	5458.31	39	4295.15	28	2995.29	14	1892.66	26	3462.51	26	4759.29
vvi-m3361-3p	27	2540.94	13	1431.72	35	3744.12	11	1487.09	2	266.347	5	915.248
vvi-m3365-3p	27	2540.94	13	1431.72	35	3744.12	11	1487.09	2	266.347	5	915.248
vvi-m1696-3p	15	1411.63	18	1982.38	15	1604.62	7	946.33	3	399.521	9	1647.45
vvi-m2225-5p	15	1411.63	9	991.189	10	1069.75	8	1081.52	10	1331.74	6	1098.3
vvi-m3114-5p	11	1035.2	7	770.925	6	641.849	9	1216.71	23	3062.99	12	2196.6
vvi-m2296-3p	9	846.979	6	660.793	12	1283.7	3	405.57	10	1331.74	8	1464.4
vvi-m0770-5p	8	752.87	6	660.793	6	641.849	3	405.57	3	399.521	6	1098.3
vvi-m1449-5p	8	752.87	8	881.057	6	641.849	14	1892.66	4	532.694	2	366.099
vvi-m2295-3p	8	752.87	6	660.793	11	1176.72	3	405.57	10	1331.74	8	1464.4
vvi-m3503-3p	8	752.87	5	550.661	11	1176.72	0	0	0	0	0	0
vvi-m3117-5p	7	658.762	6	660.793	4	427.899	1	135.19	4	532.694	2	366.099
vvi-m2962-5p	6	564.653	4	440.529	0	0	0	0	2	266.347	1	183.05
vvi-m0264-5p	5	470.544	4	440.529	1	106.975	8	1081.52	2	266.347	1	183.05
vvi-m0792-5p	5	470.544	2	220.264	1	106.975	0	0	1	133.174	1	183.05
vvi-m1553-3p	5	470.544	0	0	0	0	0	0	0	0	0	0
vvi-m1744-5p	5	470.544	2	220.264	1	106.975	0	0	1	133.174	1	183.05
vvi-m2151-5p	5	470.544	2	220.264	1	106.975	0	0	1	133.174	1	183.05
vvi-m2489-3p	5	470.544	0	0	4	427.899	2	270.38	5	665.868	3	549.149
vvi-m2569-5p	5	470.544	1	110.132	7	748.823	0	0	0	0	0	0
vvi-m2678-5p	5	470.544	2	220.264	1	106.975	0	0	1	133.174	1	183.05
vvi-m3115-5p	5	470.544	0	0	4	427.899	4	540.76	1	133.174	1	183.05
vvi-m3261-5p	5	470.544	0	0	0	0	0	0	0	0	2	366.099
vvi-m0194-5p	4	376.435	0	0	0	0	0	0	0	0	0	0
vvi-m0295-3p	4	376.435	0	0	0	0	1	135.19	0	0	2	366.099
vvi-m0668-5p	4	376.435	0	0	0	0	0	0	0	0	0	0
vvi-m0874-5p	4	376.435	0	0	0	0	0	0	0	0	0	0
vvi-m0983-5p	4	376.435	0	0	0	0	0	0	0	0	0	0
vvi-m1158-3p	4	376.435	0	0	0	0	0	0	0	0	0	0
vvi-m1541-5p	4	376.435	0	0	0	0	0	0	0	0	0	0
vvi-m1669-3p	4	376.435	2	220.264	1	106.975	0	0	1	133.174	0	0
vvi-m1765-3p	4	376.435	0	0	0	0	0	0	0	0	0	0
vvi-m1793-5p	4	376.435	0	0	0	0	0	0	3	399.521	1	183.05
vvi-m1794-5p	4	376.435	0	0	0	0	0	0	3	399.521	1	183.05
vvi-m1984-5p	4	376.435	0	0	0	0	0	0	0	0	0	0
vvi-m2468-5p	4	376.435	0	0	0	0	0	0	0	0	0	0
vvi-m2585-5p	4	376.435	0	0	0	0	0	0	3	399.521	1	183.05
vvi-m2654-5p	4	376.435	0	0	0	0	0	0	0	0	0	0
vvi-m0032-3p	3	282.326	6	660.793	1	106.975	1	135.19	2	266.347	5	915.248
vvi-m0382-3p	3	282.326	6	660.793	1	106.975	1	135.19	2	266.347	5	915.248
vvi-m0705-3p	3	282.326	6	660.793	1	106.975	1	135.19	2	266.347	5	915.248
vvi-m0937-5p	3	282.326	0	0	0	0	0	0	0	0	0	0
vvi-m1077-3p	3	282.326	0	0	0	0	0	0	0	0	0	0
vvi-m1189-3p	3	282.326	6	660.793	1	106.975	1	135.19	1	133.174	6	1098.3
vvi-m1195-3p	3	282.326	6	660.793	1	106.975	1	135.19	2	266.347	5	915.248
vvi-m1253-3p	3	282.326	0	0	0	0	0	0	0	0	0	0
vvi-m1284-3p	3	282.326	6	660.793	1	106.975	1	135.19	1	133.174	6	1098.3
vvi-m1388-3p	3	282.326	6	660.793	1	106.975	1	135.19	2	266.347	5	915.248
vvi-m1392-5p	3	282.326	0	0	0	0	0	0	0	0	0	0
vvi-m1494-3p	3	282.326	2	220.264	1	106.975	4	540.76	8	1065.39	0	0
vvi-m1871-5p	3	282.326	0	0	5	534.874	0	0	5	665.868	3	549.149
vvi-m2048-5p	3	282.326	1	110.132	0	0	0	0	0	0	0	0
vvi-m2147-3p	3	282.326	2	220.264	1	106.975	4	540.76	6	799.041	0	0
vvi-m2175-5p	3	282.326	0	0	0	0	1	135.19	1	133.174	0	0
vvi-m2403-3p	3	282.326	6	660.793	1	106.975	1	135.19	2	266.347	5	915.248
vvi-m2423-5p	3	282.326	0	0	0	0	0	0	0	0	0	0
vvi-m2481-5p	3	282.326	0	0	0	0	0	0	3	399.521	3	549.149
vvi-m2530-3p	3	282.326	2	220.264	2	213.95	5	675.95	4	532.694	1	183.05
vvi-m2532-3p	3	282.326	2	220.264	2	213.95	5	675.95	4	532.694	1	183.05
vvi-m2556-3p	3	282.326	1	110.132	0	0	1	135.19	5	665.868	0	0
vvi-m2593-3p	3	282.326	0	0	1	106.975	2	270.38	0	0	1	183.05
vvi-m2670-5p	3	282.326	5	550.661	3	320.924	4	540.76	6	799.041	7	1281.35
vvi-m2733-3p	3	282.326	0	0	0	0	0	0	0	0	0	0
vvi-m2995-3p	3	282.326	2	220.264	2	213.95	4	540.76	6	799.041	0	0
vvi-m3195-3p	3	282.326	6	660.793	1	106.975	1	135.19	2	266.347	5	915.248
vvi-m3266-3p	3	282.326	1	110.132	0	0	1	135.19	5	665.868	0	0
vvi-m3420-5p	3	282.326	0	0	5	534.874	0	0	5	665.868	3	549.149
vvi-m0145-3p	2	188.218	1	110.132	6	641.849	0	0	0	0	1	183.05
vvi-m0158-5p	2	188.218	4	440.529	2	213.95	1	135.19	0	0	2	366.099
vvi-m0182-3p	2	188.218	0	0	3	320.924	0	0	0	0	0	0
vvi-m0231-3p	2	188.218	0	0	3	320.924	0	0	0	0	0	0
vvi-m0315-3p	2	188.218	4	440.529	1	106.975	0	0	0	0	3	549.149
vvi-m0532-5p	2	188.218	3	330.396	0	0	0	0	4	532.694	2	366.099
vvi-m0602-5p	2	188.218	0	0	0	0	0	0	1	133.174	0	0
vvi-m0651-3p	2	188.218	5	550.661	1	106.975	0	0	0	0	3	549.149
vvi-m0657-5p	2	188.218	1	110.132	2	213.95	5	675.95	2	266.347	6	1098.3
vvi-m0680-5p	2	188.218	0	0	0	0	0	0	3	399.521	3	549.149
vvi-m0720-5p	2	188.218	3	330.396	8	855.798	5	675.95	8	1065.39	14	2562.69
vvi-m0736-3p	2	188.218	0	0	0	0	1	135.19	0	0	0	0
vvi-m0737-3p	2	188.218	0	0	0	0	1	135.19	0	0	0	0
vvi-m0807-3p	2	188.218	1	110.132	0	0	1	135.19	2	266.347	0	0
vvi-m0925-5p	2	188.218	1	110.132	5	534.874	4	540.76	0	0	0	0
vvi-m1006-5p	2	188.218	3	330.396	3	320.924	0	0	4	532.694	1	183.05
vvi-m1118-5p	2	188.218	0	0	0	0	1	135.19	2	266.347	0	0
vvi-m1199-3p	2	188.218	0	0	0	0	1	135.19	0	0	0	0
vvi-m1233-5p	2	188.218	0	0	0	0	3	405.57	1	133.174	0	0
vvi-m1234-5p	2	188.218	0	0	0	0	3	405.57	1	133.174	0	0
vvi-m1378-5p	2	188.218	3	330.396	0	0	0	0	3	399.521	0	0
vvi-m1493-5p	2	188.218	3	330.396	0	0	0	0	4	532.694	2	366.099
vvi-m1512-5p	2	188.218	4	440.529	5	534.874	2	270.38	4	532.694	1	183.05
vvi-m1760-5p	2	188.218	1	110.132	2	213.95	5	675.95	2	266.347	6	1098.3
vvi-m1910-5p	2	188.218	3	330.396	8	855.798	5	675.95	8	1065.39	14	2562.69
vvi-m1933-5p	2	188.218	0	0	3	320.924	0	0	3	399.521	0	0
vvi-m1938-5p	2	188.218	0	0	0	0	1	135.19	3	399.521	3	549.149
vvi-m2049-5p	2	188.218	3	330.396	0	0	0	0	4	532.694	2	366.099
vvi-m2050-5p	2	188.218	3	330.396	0	0	0	0	4	532.694	2	366.099
vvi-m2096-5p	2	188.218	1	110.132	4	427.899	0	0	4	532.694	5	915.248
vvi-m2177-5p	2	188.218	3	330.396	0	0	0	0	4	532.694	2	366.099
vvi-m2303-3p	2	188.218	1	110.132	3	320.924	2	270.38	0	0	3	549.149
vvi-m2305-5p	2	188.218	0	0	0	0	0	0	3	399.521	3	549.149
vvi-m2408-5p	2	188.218	3	330.396	3	320.924	0	0	4	532.694	1	183.05
vvi-m2447-5p	2	188.218	4	440.529	1	106.975	0	0	0	0	3	549.149
vvi-m2584-3p	2	188.218	0	0	2	213.95	0	0	2	266.347	1	183.05
vvi-m2584-5p	2	188.218	3	330.396	0	0	7	946.33	1	133.174	1	183.05
vvi-m2593-5p	2	188.218	0	0	0	0	0	0	0	0	1	183.05
vvi-m2634-3p	2	188.218	6	660.793	4	427.899	8	1081.52	14	1864.43	15	2745.74
vvi-m2783-3p	2	188.218	4	440.529	1	106.975	0	0	0	0	3	549.149
vvi-m2881-5p	2	188.218	1	110.132	2	213.95	0	0	0	0	0	0
vvi-m2894-5p	2	188.218	1	110.132	0	0	1	135.19	0	0	0	0
vvi-m2914-5p	2	188.218	3	330.396	3	320.924	0	0	4	532.694	1	183.05
vvi-m3032-3p	2	188.218	4	440.529	1	106.975	0	0	0	0	3	549.149
vvi-m3143-3p	2	188.218	1	110.132	2	213.95	0	0	0	0	0	0
vvi-m3253-5p	2	188.218	0	0	0	0	1	135.19	0	0	4	732.198
vvi-m3316-5p	2	188.218	0	0	0	0	1	135.19	0	0	4	732.198
vvi-m3418-3p	2	188.218	4	440.529	1	106.975	0	0	0	0	3	549.149
vvi-m3437-5p	2	188.218	1	110.132	0	0	1	135.19	0	0	0	0
vvi-m3453-5p	2	188.218	0	0	0	0	3	405.57	1	133.174	0	0
vvi-m3458-3p	2	188.218	4	440.529	1	106.975	0	0	0	0	3	549.149
vvi-m0024-3p	1	94.1088	0	0	4	427.899	4	540.76	3	399.521	0	0
vvi-m0060-5p	1	94.1088	0	0	0	0	1	135.19	2	266.347	0	0
vvi-m0089-3p	1	94.1088	0	0	0	0	0	0	1	133.174	0	0
vvi-m0121-3p	1	94.1088	0	0	2	213.95	0	0	0	0	1	183.05
vvi-m0145-5p	1	94.1088	1	110.132	3	320.924	0	0	1	133.174	0	0
vvi-m0159-5p	1	94.1088	0	0	5	534.874	0	0	6	799.041	2	366.099
vvi-m0415-5p	1	94.1088	0	0	1	106.975	3	405.57	0	0	3	549.149
vvi-m0495-3p	1	94.1088	1	110.132	0	0	1	135.19	2	266.347	0	0
vvi-m0521-5p	1	94.1088	3	330.396	5	534.874	0	0	2	266.347	2	366.099
vvi-m0635-3p	1	94.1088	0	0	0	0	2	270.38	0	0	0	0
vvi-m0903-5p	1	94.1088	0	0	5	534.874	0	0	6	799.041	2	366.099
vvi-m0965-5p	1	94.1088	0	0	2	213.95	0	0	0	0	0	0
vvi-m0975-3p	1	94.1088	6	660.793	1	106.975	6	811.14	0	0	8	1464.4
vvi-m1112-3p	1	94.1088	0	0	0	0	1	135.19	1	133.174	0	0
vvi-m1359-3p	1	94.1088	4	440.529	1	106.975	2	270.38	1	133.174	4	732.198
vvi-m1371-3p	1	94.1088	1	110.132	4	427.899	7	946.33	0	0	3	549.149
vvi-m1376-3p	1	94.1088	1	110.132	4	427.899	7	946.33	0	0	3	549.149
vvi-m1621-3p	1	94.1088	0	0	2	213.95	0	0	0	0	1	183.05
vvi-m1725-3p	1	94.1088	0	0	2	213.95	0	0	0	0	1	183.05
vvi-m1839-3p	1	94.1088	5	550.661	2	213.95	2	270.38	1	133.174	1	183.05
vvi-m1951-3p	1	94.1088	0	0	0	0	0	0	0	0	2	366.099
vvi-m2007-5p	1	94.1088	4	440.529	1	106.975	1	135.19	1	133.174	2	366.099
vvi-m2110-3p	1	94.1088	0	0	0	0	0	0	1	133.174	1	183.05
vvi-m2113-5p	1	94.1088	0	0	2	213.95	5	675.95	2	266.347	0	0
vvi-m2240-3p	1	94.1088	0	0	0	0	0	0	0	0	2	366.099
vvi-m2299-3p	1	94.1088	1	110.132	4	427.899	6	811.14	1	133.174	1	183.05
vvi-m2329-3p	1	94.1088	0	0	0	0	4	540.76	0	0	0	0
vvi-m2432-3p	1	94.1088	0	0	3	320.924	0	0	0	0	0	0
vvi-m2595-3p	1	94.1088	1	110.132	0	0	1	135.19	2	266.347	0	0
vvi-m2601-3p	1	94.1088	3	330.396	0	0	2	270.38	0	0	0	0
vvi-m2741-3p	1	94.1088	1	110.132	4	427.899	6	811.14	1	133.174	1	183.05
vvi-m2809-5p	1	94.1088	0	0	1	106.975	3	405.57	0	0	3	549.149
vvi-m3125-3p	1	94.1088	0	0	0	0	1	135.19	1	133.174	0	0
vvi-m3139-3p	1	94.1088	0	0	4	427.899	4	540.76	3	399.521	0	0
vvi-m3156-3p	1	94.1088	1	110.132	0	0	1	135.19	2	266.347	0	0
vvi-m3189-5p	1	94.1088	3	330.396	2	213.95	3	405.57	1	133.174	2	366.099
vvi-m3420-3p	1	94.1088	0	0	0	0	0	0	1	133.174	0	0
vvi-m0002-3p	0	0	0	0	0	0	0	0	3	399.521	0	0
vvi-m0028-5p	0	0	0	0	1	106.975	0	0	3	399.521	0	0
vvi-m0070-3p	0	0	0	0	0	0	0	0	1	133.174	0	0
vvi-m0070-5p	0	0	0	0	0	0	5	675.95	2	266.347	3	549.149
vvi-m0077-3p	0	0	0	0	0	0	0	0	3	399.521	0	0
vvi-m0089-5p	0	0	0	0	0	0	1	135.19	1	133.174	2	366.099
vvi-m0098-3p	0	0	0	0	1	106.975	0	0	4	532.694	0	0
vvi-m0143-3p	0	0	0	0	0	0	3	405.57	0	0	0	0
vvi-m0176-3p	0	0	0	0	1	106.975	0	0	2	266.347	0	0
vvi-m0235-3p	0	0	0	0	0	0	2	270.38	1	133.174	0	0
vvi-m0245-3p	0	0	2	220.264	0	0	0	0	0	0	2	366.099
vvi-m0283-5p	0	0	2	220.264	1	106.975	0	0	0	0	0	0
vvi-m0291-5p	0	0	0	0	0	0	0	0	0	0	4	732.198
vvi-m0295-5p	0	0	0	0	0	0	1	135.19	1	133.174	2	366.099
vvi-m0316-5p	0	0	3	330.396	0	0	0	0	1	133.174	1	183.05
vvi-m0319-3p	0	0	2	220.264	1	106.975	0	0	0	0	2	366.099
vvi-m0343-3p	0	0	0	0	1	106.975	1	135.19	0	0	1	183.05
vvi-m0360-5p	0	0	0	0	0	0	0	0	0	0	3	549.149
vvi-m0364-5p	0	0	4	440.529	0	0	0	0	0	0	0	0
vvi-m0376-5p	0	0	0	0	0	0	0	0	3	399.521	0	0
vvi-m0378-5p	0	0	0	0	3	320.924	0	0	0	0	0	0
vvi-m0379-3p	0	0	0	0	0	0	0	0	0	0	3	549.149
vvi-m0395-3p	0	0	0	0	3	320.924	0	0	1	133.174	0	0
vvi-m0422-5p	0	0	4	440.529	0	0	0	0	0	0	0	0
vvi-m0439-3p	0	0	0	0	0	0	0	0	3	399.521	0	0
vvi-m0451-3p	0	0	0	0	0	0	0	0	0	0	3	549.149
vvi-m0473-3p	0	0	2	220.264	1	106.975	1	135.19	0	0	0	0
vvi-m0489-3p	0	0	0	0	0	0	3	405.57	0	0	0	0
vvi-m0533-5p	0	0	0	0	8	855.798	1	135.19	8	1065.39	2	366.099
vvi-m0563-3p	0	0	0	0	0	0	0	0	0	0	3	549.149
vvi-m0569-3p	0	0	2	220.264	2	213.95	1	135.19	0	0	0	0
vvi-m0580-3p	0	0	0	0	1	106.975	0	0	0	0	0	0
vvi-m0580-5p	0	0	0	0	0	0	0	0	4	532.694	0	0
vvi-m0596-5p	0	0	3	330.396	0	0	0	0	2	266.347	0	0
vvi-m0610-5p	0	0	0	0	0	0	0	0	0	0	3	549.149
vvi-m0625-5p	0	0	0	0	0	0	3	405.57	0	0	1	183.05
vvi-m0626-3p	0	0	0	0	0	0	2	270.38	2	266.347	0	0
vvi-m0626-5p	0	0	0	0	0	0	0	0	1	133.174	1	183.05
vvi-m0634-3p	0	0	3	330.396	0	0	0	0	0	0	0	0
vvi-m0637-5p	0	0	0	0	0	0	0	0	3	399.521	0	0
vvi-m0644-3p	0	0	1	110.132	3	320.924	0	0	2	266.347	0	0
vvi-m0645-3p	0	0	1	110.132	3	320.924	0	0	2	266.347	0	0
vvi-m0646-5p	0	0	0	0	3	320.924	0	0	0	0	0	0
vvi-m0647-5p	0	0	0	0	3	320.924	0	0	0	0	0	0
vvi-m0655-5p	0	0	0	0	8	855.798	1	135.19	8	1065.39	2	366.099
vvi-m0681-5p	0	0	0	0	1	106.975	0	0	3	399.521	0	0
vvi-m0696-3p	0	0	0	0	0	0	1	135.19	2	266.347	0	0
vvi-m0696-5p	0	0	0	0	0	0	0	0	3	399.521	0	0
vvi-m0702-5p	0	0	0	0	4	427.899	0	0	0	0	0	0
vvi-m0714-3p	0	0	2	220.264	0	0	0	0	0	0	2	366.099
vvi-m0760-5p	0	0	1	110.132	1	106.975	0	0	0	0	2	366.099
vvi-m0762-3p	0	0	0	0	0	0	0	0	3	399.521	0	0
vvi-m0779-3p	0	0	0	0	4	427.899	0	0	0	0	0	0
vvi-m0786-5p	0	0	0	0	0	0	3	405.57	4	532.694	0	0
vvi-m0804-3p	0	0	0	0	8	855.798	1	135.19	8	1065.39	2	366.099
vvi-m0807-5p	0	0	0	0	0	0	1	135.19	1	133.174	2	366.099
vvi-m0832-3p	0	0	0	0	0	0	0	0	3	399.521	0	0
vvi-m0836-3p	0	0	0	0	0	0	0	0	0	0	3	549.149
vvi-m0852-3p	0	0	0	0	3	320.924	0	0	1	133.174	0	0
vvi-m0860-5p	0	0	0	0	0	0	3	405.57	0	0	0	0
vvi-m0861-5p	0	0	0	0	0	0	3	405.57	0	0	0	0
vvi-m0876-3p	0	0	0	0	0	0	0	0	0	0	4	732.198
vvi-m0878-5p	0	0	0	0	0	0	3	405.57	0	0	0	0
vvi-m0880-3p	0	0	1	110.132	3	320.924	0	0	2	266.347	0	0
vvi-m0918-3p	0	0	0	0	0	0	2	270.38	1	133.174	0	0
vvi-m0957-3p	0	0	0	0	0	0	0	0	0	0	3	549.149
vvi-m0959-5p	0	0	5	550.661	0	0	0	0	0	0	0	0
vvi-m0985-5p	0	0	0	0	1	106.975	2	270.38	1	133.174	2	366.099
vvi-m1009-5p	0	0	3	330.396	0	0	0	0	1	133.174	1	183.05
vvi-m1014-5p	0	0	0	0	0	0	0	0	3	399.521	0	0
vvi-m1025-5p	0	0	0	0	0	0	3	405.57	0	0	1	183.05
vvi-m1026-3p	0	0	10	1101.32	0	0	0	0	0	0	0	0
vvi-m1060-5p	0	0	0	0	1	106.975	2	270.38	1	133.174	2	366.099
vvi-m1084-5p	0	0	3	330.396	0	0	0	0	0	0	0	0
vvi-m1094-3p	0	0	2	220.264	0	0	0	0	0	0	2	366.099
vvi-m1099-5p	0	0	2	220.264	3	320.924	0	0	0	0	0	0
vvi-m1103-3p	0	0	0	0	0	0	0	0	3	399.521	0	0
vvi-m1108-3p	0	0	0	0	0	0	0	0	1	133.174	0	0
vvi-m1108-5p	0	0	1	110.132	2	213.95	0	0	1	133.174	0	0
vvi-m1112-5p	0	0	0	0	0	0	1	135.19	1	133.174	2	366.099
vvi-m1113-3p	0	0	1	110.132	3	320.924	1	135.19	0	0	2	366.099
vvi-m1129-3p	0	0	0	0	0	0	3	405.57	0	0	0	0
vvi-m1140-3p	0	0	3	330.396	0	0	0	0	0	0	1	183.05
vvi-m1161-5p	0	0	0	0	0	0	3	405.57	0	0	1	183.05
vvi-m1176-3p	0	0	0	0	1	106.975	0	0	2	266.347	0	0
vvi-m1198-3p	0	0	0	0	3	320.924	0	0	1	133.174	0	0
vvi-m1224-3p	0	0	2	220.264	5	534.874	0	0	0	0	0	0
vvi-m1261-3p	0	0	0	0	4	427.899	3	405.57	1	133.174	1	183.05
vvi-m1261-5p	0	0	1	110.132	0	0	0	0	0	0	0	0
vvi-m1269-3p	0	0	0	0	0	0	1	135.19	0	0	0	0
vvi-m1269-5p	0	0	1	110.132	2	213.95	0	0	1	133.174	0	0
vvi-m1276-3p	0	0	1	110.132	0	0	0	0	0	0	3	549.149
vvi-m1277-3p	0	0	1	110.132	0	0	0	0	0	0	3	549.149
vvi-m1298-3p	0	0	0	0	0	0	0	0	0	0	3	549.149
vvi-m1324-3p	0	0	0	0	0	0	0	0	4	532.694	0	0
vvi-m1326-5p	0	0	1	110.132	2	213.95	0	0	1	133.174	0	0
vvi-m1350-5p	0	0	0	0	0	0	0	0	3	399.521	0	0
vvi-m1358-5p	0	0	1	110.132	2	213.95	0	0	1	133.174	0	0
vvi-m1359-5p	0	0	1	110.132	2	213.95	0	0	1	133.174	0	0
vvi-m1414-3p	0	0	1	110.132	0	0	3	405.57	6	799.041	8	1464.4
vvi-m1421-5p	0	0	0	0	3	320.924	0	0	0	0	0	0
vvi-m1446-5p	0	0	4	440.529	1	106.975	4	540.76	2	266.347	3	549.149
vvi-m1485-5p	0	0	0	0	2	213.95	0	0	3	399.521	2	366.099
vvi-m1498-5p	0	0	0	0	3	320.924	0	0	3	399.521	1	183.05
vvi-m1501-3p	0	0	0	0	0	0	0	0	0	0	3	549.149
vvi-m1510-5p	0	0	0	0	0	0	1	135.19	1	133.174	2	366.099
vvi-m1521-5p	0	0	0	0	0	0	11	1487.09	24	3196.16	18	3294.89
vvi-m1527-5p	0	0	0	0	0	0	0	0	0	0	3	549.149
vvi-m1541-3p	0	0	0	0	0	0	0	0	0	0	2	366.099
vvi-m1548-3p	0	0	0	0	0	0	0	0	3	399.521	0	0
vvi-m1553-5p	0	0	3	330.396	0	0	0	0	1	133.174	0	0
vvi-m1624-5p	0	0	3	330.396	0	0	0	0	0	0	0	0
vvi-m1637-3p	0	0	0	0	0	0	1	135.19	4	532.694	0	0
vvi-m1655-3p	0	0	1	110.132	4	427.899	0	0	2	266.347	0	0
vvi-m1686-3p	0	0	0	0	4	427.899	0	0	0	0	0	0
vvi-m1689-5p	0	0	0	0	2	213.95	0	0	1	133.174	1	183.05
vvi-m1694-5p	0	0	0	0	0	0	0	0	3	399.521	0	0
vvi-m1734-5p	0	0	0	0	2	213.95	0	0	0	0	5	915.248
vvi-m1735-5p	0	0	0	0	2	213.95	0	0	0	0	5	915.248
vvi-m1752-3p	0	0	0	0	0	0	0	0	3	399.521	0	0
vvi-m1770-5p	0	0	3	330.396	0	0	0	0	2	266.347	0	0
vvi-m1779-5p	0	0	3	330.396	0	0	0	0	2	266.347	0	0
vvi-m1782-3p	0	0	0	0	8	855.798	1	135.19	8	1065.39	2	366.099
vvi-m1812-3p	0	0	0	0	0	0	0	0	0	0	3	549.149
vvi-m1815-3p	0	0	0	0	0	0	2	270.38	0	0	1	183.05
vvi-m1816-3p	0	0	0	0	0	0	2	270.38	0	0	1	183.05
vvi-m1818-5p	0	0	6	660.793	0	0	0	0	0	0	5	915.248
vvi-m1830-5p	0	0	3	330.396	0	0	1	135.19	1	133.174	0	0
vvi-m1831-5p	0	0	3	330.396	0	0	1	135.19	1	133.174	0	0
vvi-m1832-5p	0	0	3	330.396	0	0	1	135.19	1	133.174	0	0
vvi-m1833-5p	0	0	3	330.396	0	0	1	135.19	1	133.174	0	0
vvi-m1836-3p	0	0	2	220.264	1	106.975	0	0	0	0	0	0
vvi-m1838-3p	0	0	2	220.264	1	106.975	0	0	0	0	0	0
vvi-m1853-5p	0	0	0	0	2	213.95	0	0	2	266.347	1	183.05
vvi-m1869-3p	0	0	2	220.264	5	534.874	0	0	0	0	0	0
vvi-m1870-5p	0	0	0	0	0	0	0	0	3	399.521	0	0
vvi-m1886-5p	0	0	0	0	8	855.798	1	135.19	8	1065.39	2	366.099
vvi-m1904-5p	0	0	0	0	0	0	3	405.57	0	0	0	0
vvi-m1908-5p	0	0	0	0	5	534.874	0	0	2	266.347	0	0
vvi-m1935-5p	0	0	3	330.396	3	320.924	2	270.38	0	0	0	0
vvi-m1953-3p	0	0	0	0	7	748.823	1	135.19	2	266.347	0	0
vvi-m1954-5p	0	0	0	0	0	0	3	405.57	0	0	0	0
vvi-m1960-3p	0	0	0	0	0	0	0	0	0	0	4	732.198
vvi-m1974-5p	0	0	0	0	1	106.975	0	0	3	399.521	0	0
vvi-m1978-3p	0	0	1	110.132	4	427.899	0	0	2	266.347	0	0
vvi-m1990-5p	0	0	0	0	1	106.975	2	270.38	1	133.174	2	366.099
vvi-m2016-5p	0	0	0	0	0	0	0	0	0	0	3	549.149
vvi-m2055-3p	0	0	1	110.132	4	427.899	0	0	2	266.347	0	0
vvi-m2060-3p	0	0	3	330.396	0	0	0	0	0	0	0	0
vvi-m2079-5p	0	0	0	0	0	0	0	0	3	399.521	0	0
vvi-m2086-3p	0	0	0	0	3	320.924	0	0	0	0	0	0
vvi-m2088-5p	0	0	0	0	1	106.975	0	0	3	399.521	0	0
vvi-m2092-3p	0	0	0	0	0	0	0	0	0	0	3	549.149
vvi-m2103-5p	0	0	0	0	0	0	0	0	0	0	4	732.198
vvi-m2108-3p	0	0	0	0	0	0	0	0	3	399.521	0	0
vvi-m2109-5p	0	0	0	0	0	0	0	0	0	0	3	549.149
vvi-m2129-5p	0	0	0	0	3	320.924	0	0	0	0	0	0
vvi-m2130-5p	0	0	0	0	3	320.924	0	0	0	0	0	0
vvi-m2142-5p	0	0	0	0	2	213.95	0	0	0	0	1	183.05
vvi-m2149-3p	0	0	0	0	8	855.798	1	135.19	8	1065.39	2	366.099
vvi-m2155-5p	0	0	0	0	1	106.975	5	675.95	0	0	0	0
vvi-m2170-5p	0	0	0	0	3	320.924	0	0	0	0	0	0
vvi-m2184-5p	0	0	0	0	0	0	0	0	3	399.521	0	0
vvi-m2204-3p	0	0	0	0	2	213.95	0	0	0	0	0	0
vvi-m2204-5p	0	0	3	330.396	0	0	0	0	0	0	0	0
vvi-m2207-5p	0	0	0	0	0	0	0	0	4	532.694	0	0
vvi-m2208-5p	0	0	0	0	0	0	3	405.57	0	0	0	0
vvi-m2213-3p	0	0	0	0	1	106.975	1	135.19	1	133.174	0	0
vvi-m2225-3p	0	0	0	0	2	213.95	0	0	0	0	0	0
vvi-m2270-3p	0	0	0	0	0	0	0	0	0	0	4	732.198
vvi-m2275-5p	0	0	0	0	1	106.975	1	135.19	2	266.347	0	0
vvi-m2290-5p	0	0	0	0	3	320.924	0	0	0	0	0	0
vvi-m2296-5p	0	0	0	0	0	0	0	0	0	0	1	183.05
vvi-m2297-5p	0	0	0	0	0	0	0	0	0	0	3	549.149
vvi-m2312-3p	0	0	1	110.132	6	641.849	2	270.38	0	0	0	0
vvi-m2313-5p	0	0	0	0	0	0	1	135.19	1	133.174	2	366.099
vvi-m2321-3p	0	0	4	440.529	0	0	0	0	0	0	0	0
vvi-m2354-5p	0	0	0	0	5	534.874	0	0	2	266.347	0	0
vvi-m2357-3p	0	0	2	220.264	0	0	0	0	0	0	0	0
vvi-m2357-5p	0	0	2	220.264	0	0	1	135.19	0	0	0	0
vvi-m2376-5p	0	0	4	440.529	0	0	0	0	0	0	0	0
vvi-m2388-5p	0	0	1	110.132	2	213.95	0	0	1	133.174	0	0
vvi-m2399-3p	0	0	0	0	0	0	0	0	1	133.174	2	366.099
vvi-m2412-5p	0	0	0	0	0	0	3	405.57	0	0	0	0
vvi-m2426-5p	0	0	2	220.264	0	0	1	135.19	2	266.347	0	0
vvi-m2429-5p	0	0	0	0	0	0	0	0	4	532.694	0	0
vvi-m2434-3p	0	0	1	110.132	6	641.849	2	270.38	0	0	0	0
vvi-m2444-5p	0	0	0	0	0	0	1	135.19	0	0	3	549.149
vvi-m2447-3p	0	0	1	110.132	0	0	0	0	0	0	0	0
vvi-m2489-5p	0	0	0	0	0	0	0	0	1	133.174	0	0
vvi-m2530-5p	0	0	0	0	1	106.975	0	0	0	0	0	0
vvi-m2532-5p	0	0	0	0	1	106.975	0	0	0	0	0	0
vvi-m2564-3p	0	0	0	0	0	0	0	0	3	399.521	0	0
vvi-m2583-3p	0	0	10	1101.32	0	0	1	135.19	0	0	0	0
vvi-m2639-3p	0	0	2	220.264	1	106.975	0	0	1	133.174	2	366.099
vvi-m2642-5p	0	0	0	0	5	534.874	0	0	2	266.347	0	0
vvi-m2652-5p	0	0	0	0	0	0	0	0	0	0	3	549.149
vvi-m2668-5p	0	0	0	0	0	0	0	0	3	399.521	0	0
vvi-m2669-3p	0	0	0	0	8	855.798	1	135.19	8	1065.39	2	366.099
vvi-m2700-5p	0	0	0	0	0	0	0	0	3	399.521	0	0
vvi-m2701-3p	0	0	2	220.264	0	0	0	0	0	0	2	366.099
vvi-m2717-3p	0	0	0	0	0	0	2	270.38	3	399.521	0	0
vvi-m2736-3p	0	0	0	0	8	855.798	1	135.19	8	1065.39	2	366.099
vvi-m2737-5p	0	0	0	0	0	0	0	0	3	399.521	0	0
vvi-m2757-3p	0	0	0	0	0	0	0	0	0	0	3	549.149
vvi-m2764-5p	0	0	0	0	2	213.95	0	0	0	0	3	549.149
vvi-m2815-5p	0	0	0	0	3	320.924	0	0	0	0	0	0
vvi-m2826-3p	0	0	0	0	0	0	0	0	2	266.347	0	0
vvi-m2833-3p	0	0	0	0	4	427.899	0	0	0	0	1	183.05
vvi-m2890-5p	0	0	0	0	0	0	0	0	0	0	3	549.149
vvi-m2891-5p	0	0	1	110.132	2	213.95	0	0	1	133.174	0	0
vvi-m2894-3p	0	0	0	0	0	0	0	0	1	133.174	0	0
vvi-m2914-3p	0	0	1	110.132	0	0	1	135.19	0	0	0	0
vvi-m2917-3p	0	0	0	0	4	427.899	0	0	0	0	0	0
vvi-m2935-3p	0	0	2	220.264	4	427.899	0	0	1	133.174	0	0
vvi-m2936-5p	0	0	0	0	0	0	0	0	0	0	3	549.149
vvi-m2943-5p	0	0	1	110.132	2	213.95	0	0	1	133.174	0	0
vvi-m2961-5p	0	0	0	0	0	0	2	270.38	1	133.174	0	0
vvi-m2962-3p	0	0	2	220.264	0	0	0	0	0	0	0	0
vvi-m2965-5p	0	0	0	0	0	0	3	405.57	0	0	0	0
vvi-m2967-3p	0	0	0	0	0	0	3	405.57	0	0	0	0
vvi-m2983-3p	0	0	0	0	0	0	2	270.38	2	266.347	0	0
vvi-m2984-3p	0	0	0	0	0	0	2	270.38	2	266.347	0	0
vvi-m3038-5p	0	0	0	0	1	106.975	0	0	3	399.521	0	0
vvi-m3070-5p	0	0	4	440.529	0	0	0	0	0	0	0	0
vvi-m3084-5p	0	0	0	0	0	0	3	405.57	0	0	0	0
vvi-m3125-5p	0	0	0	0	0	0	1	135.19	1	133.174	2	366.099
vvi-m3150-3p	0	0	0	0	0	0	0	0	3	399.521	0	0
vvi-m3151-3p	0	0	0	0	0	0	0	0	3	399.521	0	0
vvi-m3157-3p	0	0	3	330.396	0	0	0	0	0	0	0	0
vvi-m3190-5p	0	0	2	220.264	3	320.924	3	405.57	2	266.347	0	0
vvi-m3193-5p	0	0	1	110.132	2	213.95	0	0	1	133.174	0	0
vvi-m3205-3p	0	0	0	0	0	0	0	0	0	0	4	732.198
vvi-m3208-5p	0	0	3	330.396	0	0	0	0	0	0	0	0
vvi-m3212-5p	0	0	3	330.396	0	0	0	0	0	0	0	0
vvi-m3218-3p	0	0	0	0	0	0	2	270.38	0	0	3	549.149
vvi-m3218-5p	0	0	0	0	0	0	1	135.19	0	0	0	0
vvi-m3219-3p	0	0	0	0	1	106.975	0	0	0	0	3	549.149
vvi-m3219-5p	0	0	0	0	0	0	4	540.76	0	0	0	0
vvi-m3220-5p	0	0	0	0	3	320.924	2	270.38	0	0	0	0
vvi-m3307-3p	0	0	0	0	0	0	3	405.57	0	0	0	0
vvi-m3331-5p	0	0	0	0	1	106.975	2	270.38	1	133.174	2	366.099
vvi-m3361-5p	0	0	0	0	1	106.975	0	0	0	0	0	0
vvi-m3365-5p	0	0	0	0	1	106.975	0	0	0	0	0	0
vvi-m3380-3p	0	0	1	110.132	3	320.924	0	0	2	266.347	0	0
vvi-m3398-5p	0	0	3	330.396	1	106.975	1	135.19	2	266.347	1	183.05
vvi-m3406-3p	0	0	0	0	3	320.924	0	0	0	0	0	0
vvi-m3430-5p	0	0	0	0	0	0	0	0	0	0	3	549.149
vvi-m3431-3p	0	0	3	330.396	0	0	0	0	0	0	0	0
vvi-m3486-5p	0	0	0	0	0	0	3	405.57	3	399.521	0	0
vvi-m3487-3p	0	0	0	0	0	0	0	0	0	0	4	732.198
vvi-m3503-5p	0	0	0	0	1	106.975	0	0	0	0	0	0
vvi-m3506-5p	0	0	0	0	2	213.95	0	0	0	0	3	549.149
vvi-m3507-5p	0	0	0	0	2	213.95	0	0	0	0	5	915.248
vvi-m3531-5p	0	0	0	0	0	0	3	405.57	0	0	0	0

## Sheet: Supplementary Table S8
Supplementary Table S8. miRNA expression abundance pattern.CPM=C/N*1000000，Where C is the number of Reads compared to the gene, and N is the number of total Reads compared to the gene.
ID	CK-1	CK-2	CK-3	HT-1	HT-2	HT-3
vvi-miR3634-3p	6818.56	6012.24	6427.42	3946.24	4062.53	3439.9
aof-miR166d	6052.89	4722.27	5503.83	3431.09	2560.27	2395.51
fve-miR162-3p	1681.76	1645.44	1784.92	1694.31	1420.24	1310.35
aof-miR159	1405.31	1251.49	1548.19	863.573	621.043	567.778
mtr-miR156g-3p	1379.7	1160.93	1220.44	846.064	578.896	556.656
vvi-miR3624-3p	818.406	638.882	776.502	713.081	522.624	527.683
vvi-miR3623-3p	686.768	746.268	717.2	486.676	333.019	352.956
aqc-miR482c	516.344	564.209	577.613	663.583	412.244	443.306
ppt-miR894	499.248	436.11	403.421	826.011	338.658	370.188
vvi-miR3623-5p	347.19	382.82	392.069	260.332	196.895	203.837
sly-miR166c-3p	342.9	281.266	296.512	156.793	126.84	119.597
aof-miR396b	214.585	179.914	188.364	199.505	141.648	156.946
cas-miR166a	208.181	205.654	207.008	72.9439	52.1143	48.7451
aof-miR396a	167.161	144.856	159.814	123.35	88.6798	92.8904
aof-miR167c	152.42	126.489	126.998	87.4842	56.6708	63.3687
pde-miR482a	130.732	124.411	146.123	108.81	101.495	91.6546
cas-miR162a	123.664	117.373	107.666	112.324	66.8658	60.4852
vvi-miR3636-5p	98.4721	94.18	122.732	44.5903	52.9687	49.775
aof-miR398	93.6996	92.102	118.673	82.8192	65.7837	60.8971
cas-miR156b-3p	90.6789	75.8802	87.9215	50.4064	48.9818	42.4289
aof-miR156b	88.2624	84.4603	79.5284	63.2503	44.0266	42.7721
aof-miR166a	85.7251	75.0088	73.5431	42.7122	30.9269	28.2173
csi-miR396f-5p	84.6377	82.2483	102.094	108.81	101.552	86.4368
cas-miR159b-3p	61.6206	56.8432	70.7225	73.8527	60.4298	56.0226
aof-miR535	59.4458	51.8158	56.3441	29.3835	15.7767	15.6534
pab-miR396t	53.1025	57.8486	66.9387	55.4349	45.1088	45.2437
ata-miR166c-3p	48.9944	42.5653	40.7961	40.5917	27.3387	28.4232
vvi-miR3636-3p	41.4429	36.1303	45.0615	20.4776	21.757	20.6652
pab-miR858b	37.5161	40.1522	40.3834	16.6608	16.4032	14.4176
vvi-miR3633a-3p	37.5161	38.7445	41.6905	34.2303	25.8009	24.1666
csi-miR168-3p	36.4891	41.3588	44.3047	26.0514	19.8205	20.5965
mes-miR482b	35.7037	41.0906	32.4718	47.0743	32.009	31.9933
ahy-miR167-3p	34.3142	33.3819	42.1033	28.6565	24.377	20.8712
atr-miR2950	27.8501	23.7964	22.9779	17.3878	12.0176	10.8475
cas-miR408	27.3668	18.4338	26.8993	19.8718	16.5741	15.4474
csi-miR403b-3p	22.2317	29.293	30.5455	28.0507	21.4153	25.883
pvu-miR482-5p	21.2651	21.9865	21.7396	20.9623	14.1819	15.3101
bdi-miR5059	20.9027	15.6185	14.3784	29.323	12.2454	13.3877
lus-miR159b	20.4798	18.2997	23.3219	17.6301	13.7263	13.5251
pab-miR2950b	20.1173	19.8415	11.9705	13.5104	5.98033	5.3551
vvi-miR3627-3p	20.0569	12.602	14.2408	25.9302	19.7636	18.0563
aof-miR167a	18.9695	21.1821	29.5136	19.5688	14.3528	15.0355
bna-miR167b	18.7882	19.9755	26.5553	16.6608	17.2575	17.0265
aof-miR156a	18.1237	13.7416	12.0393	7.57308	4.32862	4.11931
vun-miR2118	17.8216	25.204	26.1425	33.1398	18.2827	15.928
fve-miR396c-3p	17.1571	14.9481	16.7175	15.5702	8.77116	12.4266
aof-miR168a	16.4322	16.1547	15.0664	16.1761	11.1063	10.0923
ath-miR827	16.2509	25.8744	36.6684	31.1405	23.4657	25.1278
aof-miR164	13.472	14.0767	13.1401	9.81471	7.97378	6.17896
aof-miR319a	12.3845	18.903	8.66832	8.84535	5.23991	7.3461
mes-miR159a-5p	10.8138	16.6239	13.828	0.484677	1.25302	0.27462
cas-miR169d	9.7868	13.8756	16.8551	0.302923	0.455644	0.480586
aof-miR166b	9.18268	9.78668	11.9017	9.87529	5.18296	4.59989
mtr-miR166e-5p	7.67237	9.51855	8.87471	4.36209	2.22127	3.02083
aof-miR408	7.24948	7.77571	7.29239	11.8746	9.85331	6.38493
eun-miR535a-3p	7.06824	4.22302	5.57249	6.48255	3.81602	3.50141
cas-miR166f-3p	6.40371	6.09991	5.22851	8.90594	7.74596	7.14013
vvi-miR477b-3p	5.86	5.56366	5.91647	1.45403	1.30998	0.823861
ptc-miR6476c	5.79959	6.16695	5.91647	4.18034	0.968244	1.92234
vvi-miR3632-3p	5.73917	5.09443	5.4349	12.4198	7.91682	10.2983
bdi-miR7778-5p	5.67876	6.30101	5.57249	5.87671	4.1008	2.12831
cme-miR166i	5.3767	2.94941	3.30222	1.93871	0.911289	1.64772
csi-miR166f-3p	5.3767	5.56366	3.85259	4.18034	3.5882	4.25662
vvi-miR3633a-5p	4.83299	4.29005	3.50861	0.969354	0.740422	0.549241
fve-miR159a-5p	4.65175	5.49663	8.87471	0.969354	0.569556	0.480586
csi-miR171f-5p	4.28928	3.3516	4.81573	2.54455	2.0504	1.92234
lja-miR168-5p	4.22886	5.89882	5.22851	3.87742	3.64516	3.3641
cas-miR166b	4.16845	2.61425	4.60934	0.848185	0.968244	0.480586
cca-miR396c	3.74557	4.22302	3.78379	3.75625	2.39213	3.3641
aof-miR171c	3.62474	2.41315	4.05897	3.1504	2.61996	2.40293
csi-miR164a-3p	3.4435	3.21754	3.71499	2.60514	1.65171	1.57907
csi-miR477e-5p	3.4435	3.15051	3.99018	1.09052	1.5378	1.16714
vvi-miR3640-3p	3.14144	2.54722	3.85259	2.18105	1.76562	2.54024
cpa-miR167c	3.08103	2.74831	2.40787	3.57449	2.61996	2.95217
cme-miR398b	3.02062	4.08895	4.19657	4.66502	2.67691	2.40293
ath-miR8175	2.96021	2.61425	2.82064	4.66502	1.93649	3.70738
mdm-miR391	2.96021	4.89334	4.54055	2.84748	1.93649	2.54024
osa-miR5072	2.96021	1.80986	3.09583	3.938	2.73387	3.02083
tae-miR9777	2.89979	1.8769	0.89435	4.90735	1.42389	1.71638
aof-miR160a	2.83938	1.60877	1.44472	1.93871	1.0252	1.3731
cas-miR169f	2.83938	4.35708	6.19166	0.0605846	0.170867	0.205965
csi-miR159c-3p	2.65814	4.49115	3.50861	1.21169	1.76562	1.30445
fve-miR167d	2.59773	2.94941	2.54546	1.87812	2.10736	2.88352
aof-miR827	2.53732	4.22302	5.4349	4.30151	3.0756	4.39393
cas-miR858	2.41649	1.94393	3.30222	1.09052	0.569556	1.44176
aof-miR160c	2.35608	2.01096	1.37592	1.39345	1.13911	1.3731
vvi-miR2111-5p	2.35608	2.21206	2.20148	1.39345	1.30998	1.30445
cas-miR159a	2.29567	1.4747	2.06389	1.15111	1.59476	0.823861
pla-miR11610	2.29567	2.94941	1.30713	1.5752	0.569556	0.686551
ppt-miR166m	2.17484	0.938448	1.7199	1.02994	1.36693	0.617896
vvi-miR3624-5p	2.17484	3.82083	3.6462	6.54314	3.98689	3.70738
vvi-miR3639-5p	1.87278	2.48018	2.68305	2.30222	2.16431	2.95217
aof-miR5139a	1.81237	1.60877	0.963147	6.05846	4.6134	6.93417
bdi-miR166e-3p	1.81237	1.40767	2.40787	1.5752	1.36693	0.823861
cme-miR477a	1.75196	1.54174	1.92629	1.21169	0.740422	0.549241
ptc-miR396g-3p	1.75196	1.54174	1.58231	1.39345	1.48084	1.16714
aof-miR166c	1.57072	1.20658	2.06389	1.15111	0.569556	0.686551
fve-miR11285	1.57072	1.94393	1.30713	1.02994	0.911289	0.755206
vvi-miR3626-5p	1.57072	2.88238	2.27027	0.727015	0.854333	0.480586
lus-miR166k	1.51031	1.6758	1.7887	1.21169	1.0252	1.30445
ptc-miR166p	1.51031	1.07251	1.8575	0.605846	0.911289	0.617896
fve-miR159b	1.4499	0.737352	1.16954	1.15111	0.740422	0.411931
fve-miR169e	1.38948	0.737352	1.10074	0.666431	0.227822	0.205965
vun-miR482	1.38948	3.15051	1.51352	3.39274	1.99344	2.05965
cpa-miR166d	1.26866	0.536256	0.412777	0.181754	0.284778	0.343276
vvi-miR3629c	1.26866	1.13954	0.963147	0.7876	0.626511	0.0686551
mes-miR166i	1.20825	1.20658	1.30713	0.242338	0.683467	0.961172
mtr-miR482-3p	1.20825	1.4747	2.82064	1.69637	0.740422	0.549241
osa-miR2871b-5p	1.20825	0.804384	0.619166	0.727015	0.569556	0.205965
vca-miR408-5p	1.20825	1.6758	1.51352	1.93871	1.08216	2.19696
aof-miR171a	1.08742	2.48018	2.13268	0.727015	1.5378	1.3731
cas-miR403	1.08742	0.871416	0.89435	1.5752	2.84778	3.22679
aof-miR160b	1.02701	0.469224	0.343981	2.48397	0.398689	0.205965
csi-miR395c-3p	1.02701	0.871416	1.16954	0.908769	1.19607	0.961172
mes-miR482c	1.02701	1.20658	0.963147	2.30222	1.93649	0.755206
pvu-miR2119	1.02701	1.4747	0.756758	1.33286	0.911289	0.755206
osa-miR166k-5p	0.966598	0.33516	0.550369	0.242338	0.170867	0
aof-miR394	0.906185	0.67032	1.23833	0.363508	0.341733	0.411931
ata-miR5168-3p	0.906185	0.804384	3.16462	0.424092	0.626511	0.755206
csi-miR159b-5p	0.906185	1.13954	0.619166	0.545262	0.341733	0.13731
osa-miR166i-3p	0.906185	0.67032	0.687962	0.0605846	0.227822	0.0686551
crt-miR166b	0.845773	1.40767	1.30713	1.02994	1.42389	0.823861
mtr-miR5234	0.845773	0.402192	0.550369	0.181754	0.341733	0.27462
vca-miR167a-3p	0.845773	0.469224	1.03194	0.666431	0.5126	0.823861
pab-miR166j	0.785361	1.00548	0.963147	0.545262	0.341733	0.343276
vvi-miR3637-3p	0.785361	0.603288	0.206389	0.424092	0.341733	0.755206
aof-miR168b	0.724948	1.34064	0.550369	0.545262	0.569556	0.549241
cas-miR390a-3p	0.724948	0.737352	0.687962	0.7876	0.797378	0.27462
pab-miR159d	0.724948	0.268128	0.137592	0.121169	0.0569556	0.13731
ptc-miR160e-3p	0.724948	0.804384	1.03194	0.848185	0.227822	0.617896
sly-miR395b	0.724948	0.938448	0.412777	1.09052	0.398689	0.686551
sly-miR9476-5p	0.724948	0.067032	0.481573	0.424092	0.341733	0.823861
vvi-miR3631a-3p	0.724948	1.20658	1.58231	0.605846	0.854333	0.755206
aly-miR472-3p	0.664536	0.134064	0.275185	0.727015	0.0569556	0
fve-miR156h	0.664536	0.33516	0.137592	0.424092	0.170867	0
pab-miR399c	0.664536	0.469224	0.412777	0	0.0569556	0
sly-miR408	0.664536	0.536256	0.481573	0.424092	0.227822	0.13731
vvi-miR3633b-3p	0.664536	0.536256	0.89435	0.908769	1.0252	0.617896
aof-miR319b	0.604123	0.871416	0.412777	0.302923	0.227822	0.480586
aof-miR390	0.604123	1.00548	1.51352	2.12046	1.70867	1.44176
gra-miR8700	0.604123	0.268128	0.0687962	0	0.113911	0.13731
lja-miR166-3p	0.604123	0.33516	0.756758	1.5752	1.87953	1.3731
osa-miR166e-3p	0.604123	0.268128	0.481573	0.242338	0.170867	0.0686551
stu-miR156f-5p	0.604123	1.00548	0.275185	0.302923	0.0569556	0.0686551
aof-miR393b	0.543711	1.40767	1.7199	0.969354	0.455644	0.343276
gma-miR397b-3p	0.543711	0.67032	0.0687962	0.605846	0.227822	0.617896
hvu-miR156b	0.543711	1.13954	0.343981	0.121169	0.170867	0.13731
lja-miR168-3p	0.543711	0.603288	0.687962	0.363508	0.341733	0.0686551
aly-miR403b-5p	0.483299	0.67032	0.137592	0.484677	0.227822	0
ata-miR156b-3p	0.483299	1.13954	0.481573	0.545262	0.626511	0.343276
bdi-miR7758-3p	0.483299	1.13954	1.99509	0.121169	0.5126	0.0686551
cca-miR396a-3p	0.483299	0.938448	0.550369	2.72631	1.0252	1.09848
eun-miR167c-3p	0.483299	0.201096	0.275185	0.0605846	0.170867	0.205965
mes-miR169h	0.483299	1.34064	1.23833	0.181754	0.227822	0.411931
pab-miR3693g	0.483299	0.268128	0.206389	0	0.341733	0
sof-miR159e	0.483299	0.402192	0.137592	0.484677	0.227822	0.0686551
aof-miR393a	0.422886	0.603288	1.16954	0.363508	0.740422	0.480586
bdi-miR159b-3p.1	0.422886	0.201096	0.412777	0.181754	0.0569556	0.13731
cas-miR157a	0.422886	0.268128	0.206389	0	0.113911	0.0686551
cln-miR162	0.422886	0.067032	0.687962	0.302923	0.341733	0.13731
csi-miR160c-5p	0.422886	0.402192	1.23833	1.33286	0.569556	0.411931
csi-miR166j-3p	0.422886	0.33516	0.343981	0.121169	0.170867	0
csi-miR396f-3p	0.422886	0.268128	0.756758	0.7876	0.455644	0.823861
eun-miR482a-5p	0.422886	0.134064	0	0	0	0
fve-miR162-5p	0.422886	0.402192	0.89435	0.181754	0	0
mdm-miR396a	0.422886	0.804384	0.687962	0.424092	0.569556	0.13731
pab-miR396e	0.422886	0.134064	0.412777	0.0605846	0.398689	0.343276
smo-miR396	0.422886	0.201096	0	0.605846	0.0569556	0.13731
vvi-miR3625-3p	0.422886	0.268128	1.10074	0.908769	0.227822	0.343276
vvi-miR3640-5p	0.422886	0.469224	0.687962	0.302923	0.227822	0.480586
vvi-miR477b-5p	0.422886	0.603288	0.687962	0.0605846	0.170867	0
cas-miR157c	0.362474	0.268128	0.137592	0.242338	0.455644	0.0686551
cas-miR398b	0.362474	0.67032	0.275185	0.666431	0.113911	0.343276
csi-miR403b-5p	0.362474	0.536256	0.206389	0.484677	0.0569556	0.27462
pab-miR11455	0.362474	0.201096	0.550369	1.27228	1.87953	2.12831
pab-miR162c	0.362474	0.469224	0.412777	0.424092	0.5126	0.0686551
vvi-miR2950-3p	0.362474	2.01096	1.37592	2.12046	2.27822	2.81486
vvi-miR3631b-3p	0.362474	1.00548	0.89435	0.545262	0.683467	0.480586
atr-miR8590	0.302062	0.737352	0.687962	0.545262	0.284778	0.27462
gma-miR319q	0.302062	0	0	0	0	0
hbr-miR396a	0.302062	0.603288	0.687962	0.242338	0.284778	0.549241
pab-miR162a	0.302062	0.268128	0.343981	0.242338	0.227822	0.205965
stu-miR827-5p	0.302062	0.402192	0	0.121169	0	0.205965
vca-miR156a-3p	0.302062	0	0.206389	0.181754	0.227822	0.0686551
vvi-miR3632-5p	0.302062	0.201096	0.137592	0.242338	0.227822	0.823861
ath-miR5665	0.241649	0	0	0	0	0
bdi-miR7711-3p.3	0.241649	0	0	0	0	0
csi-miR167c-3p	0.241649	0.201096	0.412777	0.121169	0.341733	0.205965
csi-miR167e-3p	0.241649	0	0.0687962	0	0	0
csi-miR393c-3p	0.241649	0.603288	0.206389	0.545262	0.113911	0
lja-miR11108f-3p	0.241649	0	0.0687962	0	0	0
lja-miR164-5p	0.241649	0	0	0	0	0
lja-miR7517	0.241649	0	0.206389	0	0.0569556	0
mes-miR530b	0.241649	0	0.0687962	0	0.0569556	0
mtr-miR166b	0.241649	0.134064	0.0687962	0.0605846	0.0569556	0.480586
osa-miR159f	0.241649	0.201096	0.412777	0.242338	0.113911	0.13731
osa-miR5790	0.241649	0	0.137592	0.121169	0.113911	0
osa-miR7693-5p	0.241649	0.402192	0.275185	0.0605846	0.0569556	0
pab-miR11498c	0.241649	0	0.0687962	0	0	0
sbi-miR6221-3p	0.241649	0.201096	0.206389	0.121169	0.0569556	0
tae-miR396-5p	0.241649	0.134064	0.412777	0	0	0.0686551
vca-miR391-5p	0.241649	0.268128	0.0687962	0.121169	0	0
aly-miR398a-5p	0.181237	0	0	0	0	0
ama-miR156	0.181237	0.268128	0.481573	0.0605846	0.341733	0.0686551
aof-miR395a	0.181237	0	0.137592	0.0605846	0.113911	0
aof-miR399a	0.181237	0.268128	0	0	0	0
bdi-miR164a-3p	0.181237	0.268128	0	0.181754	0	0.411931
cas-miR171c-3p	0.181237	0.067032	0.206389	0.181754	0.0569556	0.205965
cpa-miR160f-3p	0.181237	0.067032	0.0687962	0.0605846	0	0
cpa-miR8149	0.181237	0.268128	0.412777	0	0.0569556	0.13731
cre-miR1163.2	0.181237	0	0	0	0	0
csi-miR167d-3p	0.181237	0	0.275185	0.121169	0.284778	0
eun-miR482b-3p	0.181237	0.067032	0	0.0605846	0	0.0686551
fve-miR166d-5p	0.181237	0	0	0.0605846	0	0.0686551
fve-miR171f-5p	0.181237	0.469224	0.137592	0	0.0569556	0.13731
gma-miR5762	0.181237	0.067032	0	0.0605846	0	0.0686551
gra-miR167c	0.181237	0	0.137592	0	0	0
hbr-miR6483	0.181237	0.067032	0.206389	0.0605846	0.113911	0
hvu-miR6214	0.181237	0	0	0	0	0
lja-miR11072j-5p	0.181237	0	0	0	0.0569556	0
lja-miR398-3p	0.181237	0.536256	0.275185	0.302923	0.170867	0.0686551
nta-miR6021	0.181237	0.067032	0.137592	0	0	0
osa-miR5158	0.181237	0	0	0	0	0
pab-miR3693c	0.181237	0.201096	0.137592	0.302923	0.227822	0.13731
pab-miR396a-5p	0.181237	0.536256	0.412777	1.02994	0.968244	1.23579
pla-miR11604	0.181237	0.268128	0.0687962	0.121169	0.113911	0
ptc-miR477d-5p	0.181237	0.067032	0.137592	0	0	0
ptc-miR6450a	0.181237	0	0.206389	0	0	0
sbi-miR2118-5p	0.181237	1.20658	0.206389	0.545262	0.398689	0.892517
stu-miR7994b-3p	0.181237	0	0	0	0	0
tae-miR9658-3p	0.181237	0	0	0	0	0
vca-miR528-5p	0.181237	0	0	0	0	0
vvi-miR3629a-5p	0.181237	0	0	0	0	0.0686551
zma-miR396e-3p	0.181237	0.268128	0.412777	0.0605846	0.0569556	0.27462
aly-miR166h-5p	0.120825	0	0	0	0	0.0686551
aly-miR167c-5p	0.120825	0.067032	0	0.121169	0	0
aqc-miR159	0.120825	0.469224	0.0687962	0.0605846	0.284778	0
ath-miR5020b	0.120825	0	0	0	0	0
ath-miR5658	0.120825	0	0.0687962	0.302923	0.0569556	0.0686551
atr-miR8587	0.120825	0.201096	0	0.0605846	0.0569556	0
atr-miR8611	0.120825	0	0	0	0	0
atr-miR8613	0.120825	0	0	0	0	0
bdi-miR159a-3p	0.120825	0.067032	0.206389	0	0	0.13731
bdi-miR7714-3p	0.120825	0	0	0	0	0
bdi-miR7725b-3p.2	0.120825	0	0	0	0	0
bdi-miR7752-3p	0.120825	0	0	0.0605846	0	0
bdi-miR7762-5p	0.120825	0.067032	0.275185	0.181754	0.284778	0
bdi-miR7766-5p	0.120825	0	0	0	0	0
bdi-miR7778-3p	0.120825	0	0	0	0.113911	0.0686551
bna-miR6034	0.120825	0	0.137592	0	0	0
cas-miR166c-5p	0.120825	0.134064	0	0.0605846	0	0
cca-miR156b	0.120825	0.067032	0	0	0	0
csi-miR12105-5p	0.120825	0.134064	0	0	0.0569556	0
csi-miR3951b-5p	0.120825	0	0.0687962	0.0605846	0.0569556	0
csi-miR396a-3p	0.120825	0	0	0	0	0
csi-miR858-3p	0.120825	0.134064	0	0	0	0
eun-miR167b-3p	0.120825	0.134064	0.0687962	0	0.0569556	0
eun-miR530-3p	0.120825	0	0	0	0	0
fve-miR11297	0.120825	0.067032	0	0	0	0
ghr-miR482b	0.120825	0.067032	0.0687962	0.0605846	0.0569556	0
gma-miR10407d	0.120825	0	0	0	0	0
gma-miR10412	0.120825	0	0	0.0605846	0	0
gma-miR10425	0.120825	0	0	0	0	0
gma-miR1517	0.120825	0	0	0	0	0
gma-miR1531-3p	0.120825	0	0	0.0605846	0	0
gma-miR156s	0.120825	0.134064	0.0687962	0.302923	0.227822	0.0686551
gma-miR159e-5p	0.120825	0.268128	0.137592	0.0605846	0	0
gma-miR391a-3p	0.120825	0.067032	0.481573	0.121169	0.170867	0.13731
gma-miR403b	0.120825	0.134064	0.137592	0.121169	0	0.686551
gma-miR482c-5p	0.120825	0.201096	0	0.0605846	0	0.0686551
gma-miR482d-3p	0.120825	0	0	0	0.0569556	0
gma-miR9766	0.120825	0	0	0	0.0569556	0
gra-miR7492o	0.120825	0	0.137592	0.121169	0	0
gra-miR8692	0.120825	0.134064	0	0.242338	0.227822	0.0686551
hbr-miR6485	0.120825	0	0	0	0	0
hvu-miR6186	0.120825	0	0.0687962	0	0	0.13731
lja-miR11072g-3p	0.120825	0	0.0687962	0	0	0.0686551
lja-miR11143-5p	0.120825	0.201096	0.137592	0	0.0569556	0.205965
mes-miR160e	0.120825	0.268128	0.0687962	0.121169	0.0569556	0.0686551
mtr-miR2624	0.120825	0	0	0.181754	0	0
mtr-miR5291c	0.120825	0.201096	0.0687962	0	0.113911	0.0686551
mtr-miR5754	0.120825	0	0	0	0	0
osa-miR5144-3p	0.120825	0	0	0	0	0
osa-miR5150-5p	0.120825	0	0	0	0	0
osa-miR5493	0.120825	0.201096	0	0	0	0
osa-miR5503	0.120825	0.201096	0	0.0605846	0	0
osa-miR5532	0.120825	0	0	0	0	0
pab-miR11505	0.120825	0	0	0	0	0
pab-miR11581	0.120825	0	0	0	0	0
pab-miR396u	0.120825	0.067032	0.0687962	0	0	0
pab-miR482a	0.120825	0.067032	0	0.0605846	0	0
peu-miR2916	0.120825	0	0.0687962	0	0	0
pla-miR11608	0.120825	0	0	0	0	0
ppe-miR167d	0.120825	0.134064	0	0	0.0569556	0.0686551
ppe-miR482b-3p	0.120825	0	0	0.363508	0	0.205965
ppt-miR903	0.120825	0	0	0	0.0569556	0
ptc-miR403c-5p	0.120825	0.134064	0.137592	0	0	0.0686551
rgl-miR164	0.120825	0	0	0	0	0
sly-miR6026	0.120825	0	0	0.181754	0.0569556	0
sly-miR9477-3p	0.120825	0	0	0	0	0
stu-miR7983-3p	0.120825	0	0	0	0	0
stu-miR8001a	0.120825	0	0	0	0	0
tae-miR1119	0.120825	0	0	0	0	0
vca-miR10206a-5p	0.120825	0	0	0	0	0
vca-miR166c-5p	0.120825	0.067032	0	0	0	0
vvi-miR169h	0.120825	0	0.0687962	0	0	0.0686551
vvi-miR3631d	0.120825	0	0	0	0.170867	0.0686551
vvi-miR3635-3p	0.120825	0.201096	0.343981	1.09052	0.683467	0.411931
vvi-miR3635-5p	0.120825	0	0.0687962	0	0	0
aly-miR3437-3p	0.0604123	0	0	0	0	0
aly-miR3449-5p	0.0604123	0	0	0	0	0
aly-miR393b-3p	0.0604123	0	0	0.0605846	0	0
aly-miR399i-5p	0.0604123	0.067032	0	0	0	0
aly-miR861-5p	0.0604123	0	0	0	0	0.0686551
aly-miR862-3p	0.0604123	0	0	0	0	0
aof-miR167b	0.0604123	0.067032	0.481573	0.0605846	0.0569556	0
aof-miR172	0.0604123	0.402192	0	0.121169	0	0
aof-miR482a	0.0604123	0.134064	0.137592	0	0.170867	0.0686551
aof-miR536	0.0604123	0	0	0.121169	0	0
ata-miR164a-5p	0.0604123	0.201096	0.137592	0.0605846	0.113911	0.0686551
ata-miR166d-5p	0.0604123	0	0.0687962	0	0	0
ata-miR390-3p	0.0604123	0.201096	0	0.242338	0	0.0686551
ata-miR398g-3p	0.0604123	0	0	0.0605846	0.227822	0
ath-miR398a-5p	0.0604123	0.469224	0.275185	0.121169	0	0
ath-miR419	0.0604123	0	0	0	0	0
ath-miR5632-3p	0.0604123	0	0.0687962	0	0.113911	0
ath-miR8165	0.0604123	0	0	0	0	0
ath-miR832-5p	0.0604123	0	0	0.121169	0	0.0686551
ath-miR846-5p	0.0604123	0	0	0	0	0
atr-miR8577	0.0604123	0.067032	0	0	0	0
bdi-miR159b-5p.2	0.0604123	0	0	0	0	0
bdi-miR5178-3p	0.0604123	0	0.137592	0	0	0
bdi-miR531	0.0604123	0	0	0	0	0
bdi-miR7732-3p	0.0604123	0	0.343981	0	0	0
bdi-miR7747-5p	0.0604123	0	0	0	0	0
bdi-miR7749-5p	0.0604123	0	0	0	0	0
bdi-miR7750-3p	0.0604123	0	0	0	0	0
bdi-miR7767-5p	0.0604123	0	0	0.0605846	0	0
bdi-miR7780-3p	0.0604123	0	0.0687962	0	0	0
bna-miR162a	0.0604123	0.067032	0	0.0605846	0.0569556	0
cas-miR156e-3p	0.0604123	0	0	0	0	0
cas-miR156i	0.0604123	0	0	0	0	0
cpa-miR8150	0.0604123	0	0.206389	0	0	0.0686551
cre-miR9897-5p	0.0604123	0	0	0	0	0
csi-miR482e-3p	0.0604123	0	0	0	0	0
eun-miR397b-3p	0.0604123	0	0	0	0	0
fve-miR1511	0.0604123	0	0	0.121169	0	0
fve-miR482c	0.0604123	0	0	0	0	0
gma-miR10426	0.0604123	0	0	0	0	0.13731
gma-miR10446	0.0604123	0	0.0687962	0	0	0
gma-miR1520r	0.0604123	0	0.0687962	0	0	0
gma-miR169j-3p	0.0604123	0.134064	0	0	0	0
gma-miR391-5p	0.0604123	0	0.0687962	0	0	0
gma-miR396e	0.0604123	0	0	0	0.113911	0
gma-miR396f	0.0604123	0	0	0	0.113911	0
gma-miR4378a	0.0604123	0	0	0	0	0
gma-miR4401b	0.0604123	0	0.0687962	0	0	0
gma-miR482e	0.0604123	0	0	0	0	0
gma-miR4992	0.0604123	0	0	0	0	0
gma-miR5037c	0.0604123	0	0	0	0	0
gma-miR5377	0.0604123	0	0	0	0	0
gma-miR5783	0.0604123	0	0	0.0605846	0	0
gma-miR9731	0.0604123	0	0	0	0	0
gra-miR5207	0.0604123	0	0.0687962	0	0	0
gra-miR7484n	0.0604123	0	0	0	0	0
gra-miR7504m	0.0604123	0	0	0	0	0
gra-miR8645	0.0604123	0	0	0	0.0569556	0
gra-miR8702	0.0604123	0	0	0	0	0
hbr-miR6167	0.0604123	0.201096	0	0.242338	0	0.0686551
hbr-miR6171	0.0604123	0	0.137592	0	0	0.0686551
hbr-miR6484	0.0604123	0	0	0	0	0
hci-miR164a	0.0604123	0	0	0.121169	0	0
hvu-miR6184	0.0604123	0	0	0	0	0
lja-miR11091-3p	0.0604123	0	0	0	0	0
lja-miR11095-3p	0.0604123	0	0	0	0	0
lja-miR11114-3p	0.0604123	0	0	0	0	0
lja-miR11145c-3p	0.0604123	0	0	0	0	0
lja-miR11156-5p	0.0604123	0	0.137592	0.0605846	0	0
lja-miR11160-5p	0.0604123	0.067032	0	0	0	0
lja-miR11171-5p	0.0604123	0	0	0.242338	0	0
lus-miR398f	0.0604123	0	0	0	0	0.0686551
mdm-miR11020	0.0604123	0	0	0	0	0
mdm-miR482c	0.0604123	0.067032	0	0	0	0.0686551
mdm-miR535c	0.0604123	0	0	0	0	0
mes-miR1446	0.0604123	0	0	0	0	0
mes-miR397b	0.0604123	0.402192	0.343981	0	0.170867	0.205965
mes-miR535a	0.0604123	0.201096	0.343981	0	0	0
mtr-miR172d-5p	0.0604123	0	0	0	0	0
mtr-miR2089-5p	0.0604123	0	0.0687962	0	0	0
mtr-miR2621	0.0604123	0	0	0.121169	0	0
mtr-miR2626	0.0604123	0	0	0	0	0
mtr-miR2649	0.0604123	0	0	0	0	0
mtr-miR5222	0.0604123	0	0	0.121169	0	0
mtr-miR5244	0.0604123	0.134064	0.0687962	0.0605846	0.0569556	0
mtr-miR5260	0.0604123	0	0	0	0	0
nta-miR6145b	0.0604123	0	0	0	0	0
nta-miR6160	0.0604123	0	0	0	0	0
osa-miR1854-3p	0.0604123	0	0	0	0	0
osa-miR1879	0.0604123	0	0	0.121169	0	0
osa-miR1882e-3p	0.0604123	0	0.0687962	0	0	0.0686551
osa-miR5079b	0.0604123	0	0.0687962	0	0.113911	0.0686551
osa-miR5521	0.0604123	0.067032	0	0	0	0
osa-miR5792	0.0604123	0	0	0	0	0
osa-miR5802	0.0604123	0	0	0	0	0
osa-miR5807	0.0604123	0	0.206389	0	0	0
pab-miR11443	0.0604123	0	0	0	0	0.13731
pab-miR11509	0.0604123	0	0	0.0605846	0	0
pab-miR11540	0.0604123	0	0.412777	0	0	0
pab-miR11566	0.0604123	0	0	0	0	0
pab-miR11580	0.0604123	0	0.0687962	0	0	0
pab-miR156w	0.0604123	0	0	0	0	0
pab-miR164a	0.0604123	0.469224	0.756758	0.969354	0.683467	0.27462
pab-miR167a	0.0604123	0	0	0	0	0
pab-miR167b	0.0604123	0.469224	0.481573	0.302923	0.227822	0.13731
pab-miR319j	0.0604123	0	0	0	0	0
pab-miR393d	0.0604123	0	0.275185	0	0	0
pab-miR396f	0.0604123	0	0.0687962	0	0.0569556	0
pab-miR472	0.0604123	0	0	0	0	0
pab-miR482h	0.0604123	0	0	0	0	0
pab-miR482p	0.0604123	0	0.0687962	0.121169	0	0
pab-miR950i	0.0604123	0	0	0	0	0
pgi-miR6136a.1	0.0604123	0	0.0687962	0	0	0
ppe-miR1511-3p	0.0604123	0	0	0	0	0
ppe-miR6260	0.0604123	0	0	0	0	0
ppe-miR6284	0.0604123	0.201096	0.137592	0	0	0.13731
ppt-miR1027c	0.0604123	0	0	0	0	0
ppt-miR1063h	0.0604123	0.067032	0	0.121169	0	0.0686551
ppt-miR1074	0.0604123	0	0	0	0	0
ppt-miR1222e	0.0604123	0	0	0	0	0
ppt-miR898a-3p	0.0604123	0	0.137592	0	0.0569556	0
ptc-miR167h-5p	0.0604123	0.067032	0	0	0	0
ptc-miR482d-3p	0.0604123	0.33516	0.137592	0.484677	0.113911	0.0686551
sbi-miR5565g-3p	0.0604123	0	0	0	0	0
sbi-miR5568c-3p	0.0604123	0	0	0	0	0
seu-miR11021	0.0604123	0	0	0	0	0
seu-miR11036	0.0604123	0	0	0.0605846	0	0
sly-miR319c-3p	0.0604123	0	0	0	0	0.0686551
sly-miR398a	0.0604123	0	0	0	0	0
sly-miR482e-3p	0.0604123	0.134064	0.0687962	0	0.113911	0.0686551
smo-miR1088-3p	0.0604123	0	0	0	0	0
tae-miR167b	0.0604123	0.067032	0	0	0	0
vca-miR10208-3p	0.0604123	0.067032	0	0	0	0
vca-miR10209-3p	0.0604123	0	0	0	0	0
vvi-miR3637-5p	0.0604123	0.067032	0	0.181754	0	0.411931
vvi-miR479	0.0604123	0.201096	0	0.242338	0.227822	0.13731
zma-miR159e-5p	0.0604123	0	0	0	0	0
zma-miR159i-3p	0.0604123	0	0	0	0.0569556	0.0686551
zma-miR164e-5p	0.0604123	0	0	0	0.0569556	0
zma-miR164f-3p	0.0604123	0	0	0	0	0
zma-miR166n-5p	0.0604123	0	0.275185	0.242338	0	0
zma-miR399e-5p	0.0604123	0	0	0	0	0
zma-miR399i-5p	0.0604123	0	0	0	0	0
aau-miR172	0	0.067032	0.0687962	0.0605846	0.0569556	0
ahy-miR156b-3p	0	0	0.0687962	0.121169	0	0
aly-miR156g-5p	0	0.067032	0	0	0	0
aly-miR159b-5p	0	0	0	0.0605846	0	0
aly-miR164b-3p	0	0	0	0	0.0569556	0
aly-miR168b-3p	0	0.067032	0	0	0	0
aly-miR3445-5p.1	0	0	0	0	0	0.13731
aly-miR3446-5p	0	0.067032	0	0	0	0
aly-miR399h-5p	0	0	0.137592	0	0	0
aly-miR4244	0	0	0	0	0.0569556	0
aly-miR4250	0	0	0.0687962	0	0	0
aly-miR774a-3p.2	0	0.134064	0	0	0	0
aly-miR774b-5p	0	0	0.0687962	0	0	0
aly-miR831-5p	0	0	0.0687962	0.0605846	0	0
aly-miR834-3p	0	0	0	0	0	0.13731
aly-miR834-5p	0	0	0	0	0	0.0686551
aly-miR838-3p	0	0	0.0687962	0	0	0
aly-miR840-3p	0	0	0	0	0.170867	0
aly-miR842-3p	0	0	0	0.121169	0	0
aly-miR842-5p	0	0.067032	0	0	0	0
aly-miR844-5p	0	0	0.137592	0	0	0
aly-miR847-5p	0	0.067032	0	0	0	0
aly-miR851-3p	0	0	0.0687962	0	0	0
aly-miR858-3p	0	0	0	0	0.0569556	0
aly-miR868-3p	0	0	0	0	0	0.0686551
aof-miR12140	0	0	0	0.0605846	0	0
aof-miR12144	0	0	0.137592	0	0	0.0686551
aof-miR12149	0	0	0	0	0.227822	0
aof-miR12154	0	0	0	0.181754	0	0
aof-miR12155	0	0.134064	0	0	0	0
aof-miR12169	0	0	0	0	0.0569556	0
aof-miR12174	0	0	0.0687962	0	0	0
aof-miR171b	0	0	0.0687962	0	0.113911	0
aof-miR391	0	0	0	0	0	0.0686551
aof-miR399c	0	0	0	0.121169	0	0
aof-miR482c	0	0.067032	0	0	0	0
aof-miR5139b	0	0	0	0.121169	0	0
aof-miR8155	0	0	0	0	0.113911	0.0686551
aqc-miR477b	0	0.134064	0.0687962	0.0605846	0	0.0686551
ata-miR167b-3p	0	0	0	0	0.0569556	0.0686551
ata-miR167f-5p	0	0	0.137592	0.0605846	0	0.0686551
ata-miR168-5p	0	0	0.206389	0	0	0
ata-miR319-3p	0	0	0	0	0	0.0686551
ata-miR396c-3p	0	0	0	0.121169	0	0
ata-miR396d-3p	0	0	0	0	0.113911	0
ata-miR408-3p	0	0	0.137592	0	0.0569556	0
ata-miR6201-3p	0	0	0	0.0605846	0.113911	0.13731
ata-miR9863b-3p	0	0	0.206389	0	0	0
ath-miR160c-3p	0	0	0	0	0	0.0686551
ath-miR165a-5p	0	0	0.137592	0	0	0
ath-miR2937	0	0	0.0687962	0.121169	0	0.0686551
ath-miR3440b-3p	0	0.067032	0	0	0.0569556	0
ath-miR3932b-3p	0	0	0	0	0	0.0686551
ath-miR3932b-5p	0	0.067032	0.0687962	0.242338	0	0
ath-miR403-5p	0	0	0.0687962	0	0	0
ath-miR404	0	0	0	0.121169	0	0
ath-miR4221	0	0	0.0687962	0	0	0
ath-miR447a.2-3p	0	0	0	0.0605846	0	0
ath-miR447b	0	0	0	0.121169	0	0
ath-miR5016	0	0	0.0687962	0	0	0
ath-miR5020a	0	0	0	0.0605846	0	0
ath-miR5635c	0	0	0	0.0605846	0	0
ath-miR5651	0	0	0	0.0605846	0	0
ath-miR5654-3p	0	0.067032	0	0.0605846	0	0
ath-miR5654-5p	0	0	0.206389	0	0	0
ath-miR5655	0	0	0.0687962	0	0	0
ath-miR5659	0	0.268128	0.0687962	0	0	0
ath-miR773a	0	0.067032	0	0	0	0
ath-miR836	0	0.067032	0	0	0	0
ath-miR844-3p	0	0	0	0	0.0569556	0
ath-miR854e	0	0	0	0.0605846	0	0
ath-miR861-3p	0	0	0	0	0.0569556	0
ath-miR869.1	0	0.067032	0	0	0	0
atr-miR396d	0	0	0.0687962	0	0	0.0686551
atr-miR398	0	0	0.0687962	0	0	0
atr-miR8558a	0	0.067032	0.206389	0.0605846	0	0.0686551
atr-miR8558b	0	0.067032	0.137592	0.0605846	0	0
atr-miR8565a	0	0	0	0.121169	0	0
atr-miR8565f	0	0	0	0	0	0.0686551
atr-miR8565h	0	0	0	0	0.0569556	0
atr-miR8566	0	0	0	0	0.0569556	0
atr-miR8573	0	0	0	0.121169	0	0.0686551
atr-miR8584	0	0	0.0687962	0	0	0
atr-miR8591	0	0.067032	0	0	0	0
atr-miR8601	0	0.067032	0	0	0	0
atr-miR8605	0	0	0.0687962	0	0	0
bdi-miR156e-3p	0	0	0.0687962	0	0	0
bdi-miR159b-3p.2	0	0	0	0	0.0569556	0
bdi-miR166g-3p	0	0	0	0.121169	0	0
bdi-miR319b-3p	0	0	1.92629	0	0	0
bdi-miR398b	0	0	0	0.0605846	0.0569556	0
bdi-miR408-5p	0	0.067032	0	0	0	0
bdi-miR444b	0	0	0.137592	0	0	0
bdi-miR5054	0	0.134064	0.137592	0.363508	0.170867	0
bdi-miR5055	0	0.067032	0	0.121169	0.0569556	0.13731
bdi-miR5174c-3p	0	0	0	0	0	0.0686551
bdi-miR529-3p	0	0	0.0687962	0	0	0
bdi-miR529-5p	0	0.268128	0	0	0.0569556	0
bdi-miR7707-3p	0	0	0.0687962	0	0	0
bdi-miR7716-5p	0	0.067032	0	0	0	0
bdi-miR7717c-5p	0	0	0	0	0.170867	0
bdi-miR7720-5p	0	0	0	0	0	0.0686551
bdi-miR7731-3p	0	0	0	0	0.0569556	0
bdi-miR7732-5p	0	0	0.0687962	0.363508	0.0569556	0
bdi-miR7734-5p	0	0	0.0687962	0	0	0
bdi-miR7735-5p	0	0	0	0	0	0.0686551
bdi-miR7740-3p	0	0	0	0.0605846	0	0
bdi-miR7741-3p.2	0	0	0.0687962	0	0	0
bdi-miR7746-3p	0	0	0	0.0605846	0	0
bdi-miR7748a-5p	0	0	0.550369	0	0	0
bdi-miR7752-5p	0	0	0	0	0	0.0686551
bdi-miR7761-5p	0	0	0	0	0.0569556	0
bdi-miR7764-3p	0	0	0	0	0	0.0686551
bdi-miR7765-5p	0	0	0	0	0.0569556	0
bdi-miR7769-3p	0	0	0.0687962	0	0	0
bdi-miR7775-5p	0	0	0.137592	0	0	0
bdi-miR7777-3p.2	0	0.134064	0.137592	0	0	0
bdi-miR7779-5p	0	0	0	0	0.113911	0
bdi-miR7781-5p	0	0	0.0687962	0	0	0
bdi-miR7785-3p	0	0	0	0	0.0569556	0
bdi-miR7785-5p	0	0.201096	0	0	0	0
bdi-miR7786-3p	0	0	0.137592	0	0	0
bdi-miR7787-3p	0	0	0	0	0.0569556	0
bdi-miR9486a	0	0.134064	0.206389	0	0	0.0686551
bdi-miR9488	0	0	0	0.0605846	0	0
bdi-miR9489	0	0.067032	0	0	0	0
bdi-miR9496	0	0.067032	0	0.121169	0	0
bna-miR397b	0	0	0	0	0	0.0686551
bna-miR6028	0	0	0	0.121169	0	0
bra-miR398-3p	0	0.134064	0	0	0	0
bra-miR5713	0	0	0.0687962	0	0	0
bra-miR5716	0	0	0.0687962	0	0	0
bra-miR5717	0	0	0	0.0605846	0	0
bra-miR5719	0	0	0	0	0.0569556	0
bra-miR5721	0	0.067032	0	0.545262	0.170867	0.411931
bra-miR5723	0	0.067032	0	0	0.0569556	0.13731
bra-miR5725	0	0	0	0.0605846	0	0
bra-miR9552b-3p	0	0	0.0687962	0	0	0
bra-miR9552b-5p	0	0.067032	0	0	0	0
bra-miR9558-3p	0	0	0	0	0.113911	0.13731
bra-miR9558-5p	0	0	0.0687962	0	0	0
bra-miR9561-5p	0	0.067032	0	0.181754	0	0
bra-miR9563a-5p	0	0.134064	0	0	0	0
bra-miR9563b-5p	0	0.067032	0	0	0	0
bra-miR9566-3p	0	0	0.0687962	0	0	0
bra-miR9569-3p	0	0	0	0	0	0.13731
cas-miR159c-5	0	0	0	0	0	0.0686551
cas-miR169a	0	0	0.137592	0	0	0
cas-miR393-5p	0	0.067032	0	0	0	0
cas-miR394	0	0	0.343981	0	0.284778	0.27462
cas-miR825	0	0	0.0687962	0	0	0
cas-miR827a	0	0	0.0687962	0	0.0569556	0.0686551
cas-miR827b	0	0	0	0	0	0.0686551
cas-miR9560	0	0	0	0	0.0569556	0
cca-miR6108e-5p	0	0	0	0	0.0569556	0
cca-miR6118-5p	0	0	0.137592	0	0	0
cme-miR167e	0	0	0	0.0605846	0	0
cme-miR854	0	0	0	0.0605846	0	0
cpa-miR164e	0	0	0	0	0	0.0686551
cpa-miR172b	0	0.201096	0.0687962	0	0	0
cpa-miR319	0	0	0.0687962	0	0	0
cpa-miR408	0	0	0.0687962	0	0	0
cpa-miR8148	0	0	0.206389	0	0.0569556	0
cpa-miR8152	0	0	0.0687962	0.242338	0	0
cpa-miR8154	0	0.067032	0	0	0.284778	0
cre-miR1147.1	0	0	0	0	0.0569556	0
cre-miR1149.1	0	0.134064	0	0	0	0
cre-miR1150.3	0	0.067032	0	0	0	0
cre-miR1152	0	0	0	0.0605846	0	0
cre-miR1158	0	0	0.0687962	0	0	0
cre-miR1169-3p	0	0.067032	0	0	0	0
cre-miR906-3p	0	0	0	0	0.0569556	0
cre-miR909.3	0	0	0	0	0.0569556	0
cre-miR910	0	0.134064	0	0	0	0.0686551
csi-miR12109-5p	0	0	0	0.0605846	0.170867	0
csi-miR12111-5p	0	0.201096	0	0	0	0
csi-miR156a-3p	0	0	0	0	0.0569556	0
csi-miR156f-3p	0	0	0	0	0.0569556	0.0686551
csi-miR156g-3p	0	0	0	0.0605846	0	0.0686551
csi-miR162-5p	0	0	0	0	0	0.0686551
csi-miR166b-5p	0	0	0.137592	0	0	0
csi-miR166c-5p	0	0	0	0	0.284778	0.0686551
csi-miR166g-5p	0	0	0.137592	0.181754	0.0569556	0.0686551
csi-miR166k-3p	0	0.268128	0.137592	0	0	0
csi-miR169r-5p	0	0	0	0	0	0.0686551
csi-miR172b-5p	0	0	0	0	0.0569556	0
csi-miR2111-5p	0	0.067032	0.0687962	0	0	0.343276
csi-miR395b-5p	0	0	0.0687962	0.0605846	0.113911	0
csi-miR399b-5p	0	0.067032	0.0687962	0	0.0569556	0
csi-miR482e-5p	0	0.134064	0	0	0	0
csi-miR535d-3p	0	0	0	0	0.0569556	0
csi-miR535f-5p	0	0	0.0687962	0	0	0
csi-miR857	0	0.067032	0	0	0	0.13731
cst-miR11335	0	0	0	0.0605846	0	0
dpr-miR160	0	0	0.0687962	0	0	0
eun-miR10211b-5p	0	0.067032	0	0	0	0
eun-miR10212-5p	0	0	0	0	0.0569556	0
eun-miR10214b-3p	0	0	0.137592	0.0605846	0	0
eun-miR10219-3p	0	0	0	0	0.0569556	0
eun-miR10223-5p	0	0	0.0687962	0	0	0
eun-miR159-5p	0	0	0	0	0	0.0686551
eun-miR167c-5p	0	0	0.0687962	0	0	0
eun-miR167d-5p	0	0.067032	0	0.181754	0	0
eun-miR172a-5p	0	0.067032	0.0687962	0.0605846	0.170867	0
eun-miR172c-5p	0	0.402192	0	0	0	0
eun-miR482b-5p	0	0.067032	0.0687962	0	0	0
eun-miR482c-3p	0	0.067032	0	0.121169	0	0.13731
eun-miR530-5p	0	0	0.137592	0	0	0
far-miR1134	0	0	0	0	0	0.0686551
far-miR164b	0	0	0	0.242338	0.0569556	0
fve-miR11286	0	0	0.0687962	0	0	0
fve-miR11288a	0	0.134064	0	0	0	0
fve-miR11304	0	0	0.137592	0.121169	0	0
fve-miR11307	0	0	0	0.0605846	0	0
fve-miR11311	0	0	0.0687962	0	0	0
fve-miR11312	0	0	0.0687962	0.0605846	0	0
fve-miR159c	0	0	0	0.0605846	0	0
fve-miR396e	0	0	0.0687962	0.0605846	0	0
fve-miR535b	0	0.067032	0	0	0	0
fve-miR845	0	0	0	0.0605846	0.113911	0.0686551
ghr-miR2948-5p	0	0	0.0687962	0	0	0
ghr-miR7491	0	0.067032	0	0	0.0569556	0
ghr-miR7497	0	0	0	0.121169	0.170867	0.0686551
ghr-miR7504a	0	0.067032	0	0	0	0
gma-miR10186l	0	0.067032	0	0	0	0
gma-miR10407b	0	0.067032	0	0	0	0
gma-miR10407c	0	0	0	0	0	0.0686551
gma-miR10416	0	0.134064	0	0	0	0
gma-miR10417	0	0	0	0.121169	0.0569556	0
gma-miR10427a	0	0	0	0	0.113911	0
gma-miR10434	0	0.134064	0	0	0	0
gma-miR10443	0	0	0	0.0605846	0	0
gma-miR1507c-3p	0	0.134064	0.137592	0.181754	0.113911	0
gma-miR1510a-5p	0	0	0	0	0.0569556	0
gma-miR1521b	0	0	0	0.121169	0	0
gma-miR167k	0	0.067032	0	0	0	0
gma-miR169d	0	0	0.0687962	0.0605846	0.113911	0.0686551
gma-miR169w	0	0.134064	0	0	0	0.13731
gma-miR171p	0	0	0	0.0605846	0	0
gma-miR2606b	0	0	0	0	0.0569556	0
gma-miR319l	0	0	0.0687962	0	0	0
gma-miR395g	0	0	0	0	0.113911	0.0686551
gma-miR395h	0	0	0	0	0.0569556	0
gma-miR396d	0	0.134064	0	0	0.0569556	0
gma-miR4344	0	0	0	0	0.0569556	0
gma-miR4345	0	0	0.0687962	0.0605846	0	0
gma-miR4348d	0	0	0	0.0605846	0	0
gma-miR4352b	0	0	0.137592	0	0	0
gma-miR4357	0	0.067032	0	0	0	0
gma-miR4359a	0	0	0.137592	0	0	0
gma-miR4364a	0	0	0	0	0.0569556	0
gma-miR4378b	0	0	0	0.0605846	0	0
gma-miR4379	0	0.268128	0	0	0	0
gma-miR4380a	0	0	0	0	0.0569556	0
gma-miR4381	0	0.067032	0	0	0	0
gma-miR4383	0	0	0	0.0605846	0	0
gma-miR4385	0	0	0	0	0.0569556	0
gma-miR4387b	0	0	0.0687962	0	0	0
gma-miR4387e	0	0	0.137592	0	0	0
gma-miR4393b	0	0.067032	0	0	0	0
gma-miR4404	0	0	0	0	0	0.0686551
gma-miR4405	0	0.067032	0	0	0	0
gma-miR4408	0	0	0.137592	0	0	0
gma-miR4993	0	0	0	0.121169	0	0
gma-miR5035-3p	0	0	0	0.0605846	0	0
gma-miR5043	0	0	0	0	0.0569556	0.0686551
gma-miR5380b	0	0	0	0.0605846	0	0
gma-miR5380c	0	0.134064	0	0	0	0
gma-miR5761b	0	0	0	0	0	0.0686551
gma-miR5764	0	0	0	0	0	0.13731
gma-miR5767	0	0	0	0	0	0.0686551
gma-miR5770a	0	0	0	0.0605846	0	0
gma-miR5771	0	0	0	0	0.227822	0
gma-miR5779	0	0	0	0	0	0.13731
gma-miR5781	0	0	0	0	0	0.0686551
gma-miR6300	0	0	0	0.0605846	0	0
gma-miR9722	0	0	0	0.0605846	0	0
gma-miR9723	0	0	0	0	0	0.0686551
gma-miR9735	0	0.067032	0	0	0	0
gma-miR9760	0	0	0.0687962	0	0	0
gma-miR9762	0	0	0	0.121169	0	0
gra-miR166c	0	0	0.206389	0	0	0
gra-miR7486e	0	0	0.0687962	0	0	0
gra-miR7486j	0	0	0	0.121169	0	0
gra-miR7492d	0	0.067032	0	0	0	0
gra-miR7492m	0	0	0	0.121169	0	0
gra-miR7494d	0	0	0	0.0605846	0	0
gra-miR7494f	0	0	0	0	0	0.0686551
gra-miR7504g	0	0	0	0.121169	0	0
gra-miR7506b	0	0.067032	0	0	0	0.13731
gra-miR827b	0	0	0.0687962	0	0	0
gra-miR8637	0	0	0	0	0.0569556	0
gra-miR8641	0	0.067032	0	0	0.113911	0
gra-miR8649	0	0	0.275185	0	0.0569556	0
gra-miR8655	0	0.067032	0	0	0	0
gra-miR8663b	0	0	0	0	0.0569556	0
gra-miR8674a	0	0	0	0.0605846	0	0
gra-miR8674b	0	0.067032	0	0	0	0.0686551
gra-miR8674c	0	0.067032	0	0	0	0
gra-miR8677	0	0	0	0	0	0.0686551
gra-miR8679	0	0.134064	0	0	0	0
gra-miR8691	0	0	0	0	0.0569556	0
gra-miR8705	0	0	0	0	0.113911	0.205965
gra-miR8727	0	0	0	0	0.0569556	0
gra-miR8729	0	0.067032	0	0	0	0
gra-miR8751a	0	0	0	0.121169	0	0
gra-miR8752	0	0.067032	0	0	0	0
gra-miR8757a	0	0	0.0687962	0	0	0
gra-miR8773	0	0	0	0.0605846	0	0
gra-miR8780	0	0	0	0	0.0569556	0
gra-miR8781b	0	0	0	0	0.113911	0
gra-miR8782	0	0	0	0.0605846	0	0
gra-miR8786b	0	0	0.0687962	0	0	0
han-miR3630-3p	0	0	0	0.0605846	0	0
hbr-miR2118	0	0.067032	0	0	0	0.0686551
hbr-miR398	0	0	0	0	0.113911	0.205965
hbr-miR482b	0	0	0	0.0605846	0	0
hbr-miR6168	0	0	0.137592	0	0.0569556	0
hbr-miR6169	0	0.067032	0.0687962	0	0	0
hbr-miR6482	0	0.067032	0.275185	0	0.113911	0
hci-miR156a	0	0	0	0.0605846	0	0
hvu-miR168-3p	0	0	0	0.0605846	0	0
hvu-miR444b	0	0	0.137592	0	0	0.0686551
hvu-miR5052	0	0	0.0687962	0	0	0
hvu-miR6182	0	0	0	0	0.170867	0
hvu-miR6192	0	0	0.137592	0	0	0
hvu-miR6193	0	0.067032	0	0	0	0
hvu-miR6207	0	0	0	0.0605846	0	0
hvu-miR6208	0	0	0	0.0605846	0	0
hvu-miR6213	0	0	0.0687962	0	0	0
lja-miR11066-3p	0	0	0	0.0605846	0	0
lja-miR11072b-5p	0	0	0.137592	0	0	0
lja-miR11077b-5p	0	0.067032	0	0	0	0
lja-miR11078g-3p	0	0	0	0.0605846	0.0569556	0
lja-miR11088b-5p	0	0	0	0	0.0569556	0
lja-miR11097a-3p	0	0	0	0.121169	0	0
lja-miR11097a-5p	0	0	0.0687962	0	0	0
lja-miR11103c-3p	0	0	0.206389	0	0	0
lja-miR11103c-5p	0	0	0	0	0.0569556	0
lja-miR11108d-3p	0	0	0	0.121169	0	0
lja-miR11108r-5p	0	0	0	0.0605846	0	0
lja-miR11110b-5p	0	0	0	0.121169	0	0
lja-miR11112-3p	0	0	0	0.0605846	0	0
lja-miR11119-5p	0	0	0	0	0	0.0686551
lja-miR11122-3p	0	0	0.0687962	0	0	0
lja-miR11136-5p	0	0.134064	0	0.0605846	0	0
lja-miR11141-3p	0	0	0	0	0.0569556	0.0686551
lja-miR11149a-3p	0	0	0	0.121169	0	0
lja-miR11155a-5p	0	0	0.0687962	0	0	0
lja-miR11155c-5p	0	0	0.0687962	0	0	0
lja-miR11158-3p	0	0	0.0687962	0	0	0.0686551
lja-miR11164-5p	0	0	0.0687962	0	0	0
lja-miR11168-5p	0	0.134064	0	0	0	0
lja-miR11169-5p	0	0.201096	0	0	0	0
lja-miR11172-5p	0	0	0	0	0.170867	0
lja-miR11176-3p	0	0.067032	0	0	0.0569556	0
lja-miR1120-3p	0	0	0	0.121169	0	0
lja-miR395-3p	0	0	0.0687962	0	0	0
lja-miR7523b	0	0	0.0687962	0	0	0
lja-miR7526k-3p	0	0	0	0	0	0.0686551
lja-miR7528	0	0.134064	0	0	0	0
lja-miR7530	0	0	0	0	0.0569556	0
lja-miR7545	0	0.201096	0	0	0	0
lus-miR395e	0	0	0.0687962	0	0	0
lus-miR396d	0	0	0	0	0.0569556	0
lus-miR398e	0	0	0.0687962	0	0	0
mdm-miR10980b	0	0.067032	0	0	0	0
mdm-miR11002b	0	0.134064	0	0	0	0
mdm-miR11002c-5p	0	0	0	0	0	0.0686551
mdm-miR11006	0	0	0.137592	0	0	0
mdm-miR169f	0	0	0	0.0605846	0.0569556	0
mdm-miR171o	0	0	0.0687962	0	0	0
mdm-miR482a-5p	0	0	0.0687962	0	0	0
mdm-miR482b	0	0	0.0687962	0.0605846	0	0
mes-miR171l	0	0	0	0.0605846	0.113911	0
mes-miR2118	0	0	0	0.0605846	0	0
mes-miR319h	0	0.067032	0	0	0	0
mes-miR394c	0	0.134064	0	0.302923	0	0
mes-miR477g	0	0.067032	0	0	0.227822	0
mes-miR482e	0	0	0	0.0605846	0	0
mes-miR535d	0	0	0	0.0605846	0	0
mtr-miR1507-3p	0	0.067032	0	0	0	0
mtr-miR1510b-3p	0	0	0	0	0	0.0686551
mtr-miR166d	0	0.067032	0	0	0	0
mtr-miR168a	0	0	0.0687962	0	0	0
mtr-miR2118	0	0	0.137592	0.0605846	0.0569556	0
mtr-miR2119	0	0	0	0	0	0.13731
mtr-miR2586a	0	0.134064	0	0	0.0569556	0.0686551
mtr-miR2600e	0	0	0.137592	0	0	0
mtr-miR2601	0	0	0.137592	0	0	0
mtr-miR2610b	0	0	0	0	0.170867	0
mtr-miR2611	0	0.134064	0	0	0	0
mtr-miR2617b	0	0	0	0	0.227822	0
mtr-miR2640	0	0.134064	0	0	0	0
mtr-miR2647c	0	0.067032	0	0	0	0
mtr-miR2656e	0	0	0	0	0	0.0686551
mtr-miR2660	0	0.067032	0	0	0	0
mtr-miR2678	0	0	0	0.0605846	0	0
mtr-miR319b-5p	0	0.067032	0	0	0	0
mtr-miR319c-3p	0	0	0	0.121169	0	0
mtr-miR4414b	0	0.067032	0	0	0	0
mtr-miR5206b	0	0.067032	0	0	0	0
mtr-miR5208c	0	0.201096	0	0	0	0
mtr-miR5213-5p	0	0	0	0	0	0.0686551
mtr-miR5221	0	0	0	0.0605846	0	0
mtr-miR5223	0	0.134064	0	0	0.113911	0
mtr-miR5224b	0	0	0	0.0605846	0	0
mtr-miR5227	0	0	0.206389	0	0	0.0686551
mtr-miR5240	0	0	0	0	0.0569556	0
mtr-miR5255	0	0.067032	0	0	0	0
mtr-miR5268b	0	0.067032	0.137592	0	0.0569556	0
mtr-miR5269b	0	0	0.0687962	0	0	0
mtr-miR5274b-5p	0	0.134064	0	0	0.0569556	0
mtr-miR5281a	0	0	0	0	0.0569556	0
mtr-miR5282	0	0	0	0.0605846	0	0
mtr-miR5293	0	0.067032	0	0	0	0
mtr-miR5296	0	0	0	0	0	0.205965
mtr-miR5298a	0	0.067032	0	0	0	0
mtr-miR5298c	0	0	0	0.0605846	0	0
mtr-miR5556-3p	0	0	0	0.181754	0	0
mtr-miR5561-5p	0	0	0	0.0605846	0	0
mtr-miR5749	0	0	0.137592	0	0	0
nta-miR171a	0	0.067032	0	0	0	0
nta-miR482d	0	0.268128	0	0	0	0
nta-miR6151f	0	0	0.0687962	0	0	0
osa-miR11336-3p	0	0	0	0	0	0.13731
osa-miR11340-5p	0	0	0	0	0	0.13731
osa-miR1427	0	0	0	0	0.0569556	0
osa-miR166g-5p	0	0	0	0.121169	0	0
osa-miR167i-3p	0	0	0	0.121169	0	0
osa-miR1846c-5p	0	0	0	0	0	0.205965
osa-miR1848	0	0.067032	0	0	0	0
osa-miR1852	0	0.067032	0	0	0	0
osa-miR1860-5p	0	0	0	0	0	0.0686551
osa-miR1861n	0	0.067032	0.137592	0	0	0
osa-miR1862c	0	0	0	0	0	0.205965
osa-miR1863b.2	0	0.134064	0	0	0	0
osa-miR1866-5p	0	0	0	0	0	0.0686551
osa-miR1876	0	0	0	0	0.0569556	0
osa-miR1877	0	0	0	0.242338	0	0
osa-miR2094-3p	0	0	0.0687962	0.0605846	0	0
osa-miR2118r	0	0	0.0687962	0	0	0
osa-miR2121b	0	0	0	0	0	0.0686551
osa-miR2865	0	0	0.0687962	0.0605846	0	0.0686551
osa-miR2873c	0	0	0	0.181754	0	0
osa-miR2880	0	0	0	0	0.0569556	0
osa-miR2924	0	0.067032	0	0	0	0
osa-miR3980b-5p	0	0	0.0687962	0	0	0
osa-miR3981-5p	0	0	0	0	0	0.0686551
osa-miR415	0	0	0.0687962	0	0	0
osa-miR419	0	0.067032	0	0	0	0
osa-miR440	0	0	0	0.0605846	0	0
osa-miR444c.1	0	0	0.206389	0	0	0
osa-miR5075	0	0	0	0.242338	0	0
osa-miR5077	0	0	0	0.121169	0.113911	0
osa-miR5082	0	0.134064	0.137592	0.302923	0	0.0686551
osa-miR5151	0	0	0	0.0605846	0	0
osa-miR5153	0	0	0	0.121169	0	0
osa-miR5155	0	0	0.137592	0	0	0
osa-miR5156	0	0	0	0	0.0569556	0
osa-miR529b	0	0.134064	0	0.0605846	0.113911	0
osa-miR5340	0	0.201096	0.137592	0.302923	0	0
osa-miR5487	0	0.067032	0	0	0	0
osa-miR5488	0	0	0.0687962	0	0	0
osa-miR5491	0	0	0	0	0.0569556	0
osa-miR5499	0	0.134064	0	0	0	0
osa-miR5501	0	0	0	0.121169	0	0
osa-miR5512b	0	0	0	0.121169	0	0
osa-miR5535	0	0	0	0.0605846	0	0
osa-miR5538	0	0	0	0.181754	0	0
osa-miR5541	0	0.067032	0	0	0	0
osa-miR5791	0	0.067032	0	0	0	0
osa-miR5798	0	0.067032	0	0	0	0
osa-miR5801b	0	0	0	0	0	0.0686551
osa-miR5813	0	0.201096	0	0	0	0
osa-miR5817	0	0	0	0.121169	0	0
osa-miR5823	0	0	0.137592	0	0	0.0686551
osa-miR5833	0	0	0.0687962	0	0	0
osa-miR6248	0	0	0	0	0	0.13731
osa-miR812j	0	0	0	0.121169	0	0
osa-miR818f	0	0.067032	0.275185	0.0605846	0	0.13731
pab-miR11408a	0	0.201096	0	0	0.0569556	0
pab-miR11420c	0	0	0	0	0.0569556	0
pab-miR11426a	0	0	0.0687962	0	0	0
pab-miR11428	0	0	0	0	0	0.0686551
pab-miR11446	0	0	0	0	0.0569556	0
pab-miR11451	0	0.134064	0	0	0	0
pab-miR11453	0	0	0.0687962	0.0605846	0	0
pab-miR11456	0	0	0	0	0.0569556	0
pab-miR11466b	0	0	0	0	0	0.0686551
pab-miR11480	0	0	0	0.0605846	0	0
pab-miR11500	0	0	0	0	0.113911	0
pab-miR11518	0	0	0	0.242338	0	0
pab-miR11524	0	0	0.0687962	0.242338	0	0
pab-miR11528	0	0.067032	0	0	0	0
pab-miR11536	0	0.067032	0	0	0	0
pab-miR11546a	0	0	0.343981	0.0605846	0	0.480586
pab-miR11553	0	0.067032	0	0.0605846	0	0
pab-miR11570c	0	0	0.0687962	0	0	0
pab-miR11578	0	0.134064	0	0	0.113911	0
pab-miR1312b	0	0	0	0	0.113911	0
pab-miR156ab	0	0	0	0	0	0.0686551
pab-miR159f	0	0.067032	0	0	0	0
pab-miR3627f	0	0	0.137592	0	0	0
pab-miR3698	0	0	0	0.0605846	0	0
pab-miR3710i	0	0	0	0.0605846	0.113911	0
pab-miR3711	0	0.067032	0	0	0	0
pab-miR482j	0	0	0.343981	0	0	0
pab-miR482n	0	0	0	0	0.0569556	0
pab-miR482o	0	0	0.137592	0	0	0
pab-miR482s	0	0	0.137592	0.0605846	0.0569556	0
pab-miR858a	0	0	0	0	0	0.0686551
pab-miR946d	0	0.067032	0	0	0	0
pde-miR159	0	0.067032	0	0.181754	0.113911	0
pde-miR3712	0	0	0	0	0	0.0686551
pde-miR947	0	0	0	0.0605846	0	0
pgi-miR482b	0	0.134064	0	0	0.0569556	0
pgi-miR6138	0	0	0.0687962	0	0	0
pla-miR11609	0	0	0	0.121169	0	0
ppe-miR171e	0	0.067032	0	0	0	0
ppe-miR319b	0	0.067032	0	0	0	0
ppe-miR396a	0	0	0	0.0605846	0.0569556	0.0686551
ppe-miR398b	0	0.134064	0.206389	0	0.0569556	0
ppe-miR482b-5p	0	0	0	0	0	0.0686551
ppe-miR482c-5p	0	0	0.0687962	0	0	0
ppe-miR482d-5p	0	0	0	0	0.0569556	0
ppe-miR482f	0	0.201096	0.0687962	0	0	0.0686551
ppe-miR5225-5p	0	0	0	0	0.0569556	0
ppe-miR6257	0	0	0.0687962	0	0	0
ppe-miR6265	0	0	0.0687962	0.121169	0	0
ppe-miR6267a	0	0	0	0.0605846	0	0.0686551
ppe-miR6274b-3p	0	0	0.0687962	0	0	0
ppe-miR6279	0	0	0.0687962	0	0	0
ppe-miR6281	0	0	0	0.0605846	0	0
ppe-miR6282	0	0	0.137592	0	0	0
ppe-miR6283	0	0	0.0687962	0	0	0
ppe-miR6291b	0	0	0.0687962	0	0	0
ppe-miR7122a-3p	0	0.134064	0	0	0	0
ppe-miR8122-3p	0	0	0	0	0.0569556	0
ppe-miR8128-5p	0	0.067032	0	0	0	0
ppe-miR8129-3p	0	0	0.0687962	0	0	0
ppe-miR8130-5p	0	0	0	0	0.113911	0
ppe-miR8133-5p	0	0	0.0687962	0	0	0
ppt-miR1028a-5p	0	0	0	0	0.0569556	0
ppt-miR1030g	0	0	0.0687962	0	0	0
ppt-miR1030j	0	0	0	0	0	0.0686551
ppt-miR1046-5p	0	0	0	0	0	0.205965
ppt-miR1049	0	0	0	0	0.0569556	0
ppt-miR11317	0	0	0	0.181754	0.0569556	0
ppt-miR1217-3p	0	0.067032	0	0	0	0
ppt-miR1217-5p	0	0	0	0	0	0.0686551
ppt-miR2084	0	0	0.0687962	0	0	0
ppt-miR419	0	0	0	0	0	0.13731
ppt-miR893	0	0.067032	0	0.0605846	0.113911	0
ppt-miR900-3p	0	0	0.275185	0	0	0
ppt-miR902i-3p	0	0	0	0.121169	0	0
ppt-miR902j-3p	0	0.067032	0	0	0	0
ppt-miR902k-3p	0	0	0.0687962	0	0	0
ppt-miR902l-5p	0	0	0.0687962	0	0	0
pta-miR950b	0	0.067032	0	0	0	0
ptc-miR156l	0	0	0.137592	0	0	0
ptc-miR477e-3p	0	0	0.0687962	0	0	0
ptc-miR478e	0	0.134064	0	0	0	0
ptc-miR6426b	0	0	0	0	0	0.0686551
ptc-miR6432	0	0.067032	0	0	0	0
ptc-miR6437a	0	0.067032	0	0.121169	0	0
ptc-miR6443	0	0	0.0687962	0	0	0
ptc-miR6478	0	0	0.0687962	0	0	0
ptc-miR7823	0	0	0	0.0605846	0	0
ptc-miR7825	0	0	0	0	0	0.0686551
ptc-miR7836	0	0.201096	0	0.0605846	0	0
ptc-miR7838	0	0	0	0.121169	0	0
rgl-miR5141	0	0	0	0.0605846	0	0
rgl-miR7800	0	0.067032	0	0	0	0
rgl-miR7807a-3p	0	0	0	0	0.0569556	0
rgl-miR7972	0	0.067032	0	0	0	0.0686551
sbi-miR5386	0	0	0	0	0	0.0686551
sbi-miR5388	0	0.067032	0	0	0	0
sbi-miR5565b	0	0	0	0	0	0.0686551
sbi-miR5568f-3p	0	0	0	0.0605846	0	0
sbi-miR5569	0	0.067032	0	0.0605846	0	0
sbi-miR6221-5p	0	0	0	0	0.113911	0
sbi-miR6222-3p	0	0.067032	0	0	0	0
sbi-miR6225-5p	0	0	0	0.0605846	0	0
sbi-miR6229-3p	0	0.134064	0	0	0.0569556	0
sbi-miR6232b-3p	0	0.134064	0	0	0	0
seu-miR11022	0	0	0	0	0.0569556	0.13731
seu-miR11025	0	0.067032	0	0	0	0.205965
seu-miR11026	0	0	0.137592	0.0605846	0.0569556	0
seu-miR11032	0	0.067032	0	0	0	0
seu-miR11034	0	0	0.0687962	0	0	0
seu-miR11039	0	0	0.0687962	0	0	0
seu-miR11042	0	0	0	0	0.0569556	0
sly-miR10532	0	0	0.0687962	0	0	0
sly-miR159b	0	0	0	0	0.0569556	0.13731
sly-miR166c-5p	0	0	0.0687962	0.0605846	0	0.0686551
sly-miR167b-5p	0	0	0	0.0605846	0	0
sly-miR171e	0	0	0	0	0.0569556	0
sly-miR390a-3p	0	0.134064	0	0	0.227822	0.205965
sly-miR482e-5p	0	0	0	0.0605846	0	0
sly-miR7981f	0	0.067032	0	0	0	0
sly-miR827	0	0.067032	0	0	0	0
sly-miR9469-3p	0	0.067032	0.0687962	0	0	0.0686551
sly-miR9471b-3p	0	0.067032	0	0	0	0
sly-miR9475-3p	0	0	0	0.0605846	0	0.0686551
smo-miR1098	0	0	0	0.121169	0	0
smo-miR1101-5p	0	0	0	0	0.0569556	0
smo-miR171a	0	0	0	0.121169	0	0
sof-miR408e	0	0	0	0.121169	0	0
stu-miR1886f	0	0	0	0	0.0569556	0
stu-miR319-3p	0	0.067032	0	0	0	0
stu-miR397-5p	0	0	0.0687962	0	0	0
stu-miR408a-3p	0	0	0	0.0605846	0	0
stu-miR408a-5p	0	0.067032	0	0	0	0
stu-miR5303f	0	0.134064	0	0	0	0
stu-miR5303i	0	0	0.0687962	0	0	0
stu-miR7983-5p	0	0	0.0687962	0	0	0
stu-miR7984c-3p	0	0	0	0.0605846	0	0
stu-miR7984d-5p	0	0.134064	0	0	0	0
stu-miR7987	0	0	0	0	0.113911	0
stu-miR7991c	0	0.134064	0	0	0	0
stu-miR7997b	0	0	0	0.0605846	0	0
stu-miR7997c	0	0	0.0687962	0	0	0
stu-miR7999-3p	0	0	0	0	0.113911	0
stu-miR8004	0	0.067032	0	0	0.0569556	0
stu-miR8012	0	0	0.0687962	0	0	0
stu-miR8013	0	0	0.206389	0	0	0
stu-miR8015-3p	0	0.067032	0	0	0	0
stu-miR8024a-5p	0	0	0	0	0.0569556	0
stu-miR8026	0	0.134064	0	0	0	0
stu-miR8038b-3p	0	0	0	0	0.0569556	0
stu-miR8044-3p	0	0	0	0	0	0.13731
stu-miR8049-5p	0	0	0	0.0605846	0	0
tae-miR1131	0	0	0	0.121169	0	0
tae-miR1847-5p	0	0.134064	0	0	0	0
tae-miR531	0	0	0	0.0605846	0	0
tae-miR9656-3p	0	0	0	0	0	0.0686551
tae-miR9676-5p	0	0	0	0	0	0.13731
tae-miR9773	0	0	0	0	0.0569556	0
tcc-miR535	0	0	0	0.0605846	0	0
vca-miR396-3p	0	0	0.0687962	0	0	0
vvi-miR159b	0	0.201096	0	0.302923	0.227822	0.27462
vvi-miR2111-3p	0	0	0.0687962	0	0.0569556	0
vvi-miR3625-5p	0	0.067032	0.137592	0	0	0
vvi-miR3626-3p	0	0	0.137592	0	0	0
vvi-miR3627-5p	0	0	0	0	0.113911	0
vvi-miR3630-3p	0	0	0.137592	0	0.0569556	0
vvi-miR3633b-5p	0	0	0	0.181754	0	0.0686551
vvi-miR3634-5p	0	0	0	0.181754	0.227822	0
zma-miR156g-3p	0	0	0	0	0	0.0686551
zma-miR156h-3p	0	0	0.0687962	0	0	0
zma-miR156j-3p	0	0	0.0687962	0	0	0
zma-miR164b-3p	0	0.067032	0	0	0	0
zma-miR164e-3p	0	0	0.0687962	0	0	0
zma-miR164h-5p	0	0	0.137592	0.545262	0.0569556	0.13731
zma-miR166h-5p	0	0	0	0	0.0569556	0
zma-miR166j-5p	0	0	0	0	0	0.0686551
zma-miR167d-3p	0	0	0	0	0.0569556	0
zma-miR169f-3p	0	0	0	0.0605846	0	0
zma-miR171c-3p	0	0	0	0.302923	0.0569556	0.0686551
zma-miR171e-5p	0	0.134064	0	0	0.0569556	0
zma-miR171h-5p	0	0	0	0.121169	0	0
zma-miR2118c	0	0.067032	0	0	0	0
zma-miR396g-3p	0	0.201096	0	0	0	0

## Sheet: Supplementary Table S9
Supplementary Table S9. Target gene prediction of miRNA
miRNA	target genes (mRNA)	score
osa-miR166i-3p	VIT_217s0000g07900.v2.1	2.5
osa-miR166i-3p	VIT_217s0000g07900.v2.1	2.5
osa-miR166i-3p	VIT_217s0000g07900.v2.1	2.5
osa-miR166i-3p	VIT_213s0019g04320.v2.1	2.2
osa-miR166i-3p	VIT_213s0019g04320.v2.1	2.2
osa-miR166i-3p	VIT_213s0019g04320.v2.1	2.2
osa-miR166i-3p	VIT_213s0019g04320.v2.1	2.2
osa-miR166i-3p	VIT_213s0019g04320.v2.1	2.2
osa-miR166i-3p	VIT_213s0019g04320.v2.1	2.2
osa-miR166i-3p	VIT_213s0019g04320.v2.1	2.2
osa-miR166i-3p	VIT_206s0004g02800.v2.1	2.2
osa-miR166i-3p	VIT_206s0004g02800.v2.1	2.2
osa-miR166i-3p	VIT_206s0004g02800.v2.1	2.2
osa-miR166i-3p	VIT_204s0008g03250.v2.1	2.2
osa-miR166i-3p	VIT_204s0008g03250.v2.1	2.2
osa-miR166i-3p	VIT_209s0002g03740.v2.1	1.8
ath-miR827	VIT_215s0048g00940.v2.1	2.2
mtr-miR166e-5p	VIT_214s0108g00480.v2.1	2.5
mtr-miR166e-5p	VIT_214s0108g00480.v2.1	2.5
mtr-miR166e-5p	VIT_214s0108g00480.v2.1	2.5
mtr-miR166e-5p	VIT_214s0108g00480.v2.1	2.5
mtr-miR166e-5p	VIT_209s0002g01830.v2.1	2.5
mtr-miR166e-5p	VIT_209s0002g01830.v2.1	2.5
mtr-miR156g-3p	VIT_212s0035g01080.v2.1	2.5
mtr-miR156g-3p	VIT_212s0035g01080.v2.1	2.5
mtr-miR156g-3p	VIT_212s0035g01080.v2.1	2.5
mtr-miR156g-3p	VIT_206s0004g06440.v2.1	2.5
mtr-miR156g-3p	VIT_205s0094g01330.v2.1	2.5
aqc-miR482c	VIT_212s0121g00050.v2.1	1.5
aqc-miR482c	VIT_213s0139g00130.v2.1	2
aqc-miR482c	VIT_213s0139g00130.v2.1	2.5
aqc-miR482c	VIT_213s0139g00070.v2.1	2.5
aqc-miR482c	VIT_213s0047g00095.v2.1	2.5
aqc-miR482c	VIT_219s0014g05135.v2.1	2.5
aqc-miR482c	VIT_219s0014g05150.v2.1	1.5
aqc-miR482c	VIT_219s0014g05150.v2.1	1.5
aqc-miR482c	VIT_213s0019g00380.v2.1	2.5
aqc-miR482c	VIT_213s0019g01140.v2.1	2.5
vvi-miR3623-3p	VIT_217s0000g07550.v2.1	2.2
vvi-miR3623-3p	VIT_217s0000g07550.v2.1	2.2
vvi-miR3623-3p	VIT_217s0000g07550.v2.1	2.2
vvi-miR3623-3p	VIT_217s0000g07550.v2.1	2.2
vvi-miR3623-3p	VIT_217s0000g02000.v2.1	2.5
vvi-miR3623-3p	VIT_217s0000g02000.v2.1	2.5
vvi-miR3623-3p	VIT_217s0000g02000.v2.1	2.5
vvi-miR3623-3p	VIT_217s0000g02000.v2.1	2.5
vvi-miR3623-3p	VIT_217s0000g02000.v2.1	2.5
vvi-miR3623-3p	VIT_217s0000g02000.v2.1	2.5
vvi-miR3624-5p	VIT_214s0068g01390.v2.1	2.5
vvi-miR3624-5p	VIT_214s0068g01390.v2.1	2.5
vvi-miR3624-5p	VIT_216s0050g02040.v2.1	2.5
vvi-miR3624-5p	VIT_203s0017g01490.v2.1	2.2
vvi-miR3624-5p	VIT_200s0211g00020.v2.1	2.5
vvi-miR3626-5p	VIT_208s0007g04400.v2.1	1
vvi-miR3626-5p	VIT_208s0007g04400.v2.1	1
vvi-miR3626-5p	VIT_216s0050g02710.v2.1	2.5
vvi-miR3626-5p	VIT_210s0116g00910.v2.1	2
vvi-miR477b-3p	VIT_218s0001g03710.v2.1	2.5
vvi-miR477b-3p	VIT_201s0010g01450.v2.1	2.2
vvi-miR477b-3p	VIT_201s0010g00380.v2.1	2.2
vvi-miR477b-3p	VIT_206s0004g08220.v2.1	2
vvi-miR477b-3p	VIT_209s0002g03460.v2.1	2.2
vvi-miR3632-3p	VIT_214s0060g02630.v2.1	2.5
vvi-miR3632-3p	VIT_213s0067g00780.v2.1	2.5
vvi-miR3632-3p	VIT_213s0067g00760.v2.1	2.5
vvi-miR3632-3p	VIT_213s0067g00760.v2.1	2.5
vvi-miR3632-3p	VIT_213s0067g00790.v2.1	1.5
vvi-miR3632-3p	VIT_213s0064g00550.v2.1	2.5
vvi-miR3632-3p	VIT_213s0067g00830.v2.1	1.5
vvi-miR3632-3p	VIT_213s0067g00830.v2.1	1.5
vvi-miR3632-3p	VIT_213s0067g00830.v2.1	1.5
vvi-miR3632-3p	VIT_213s0067g00830.v2.1	1.5
vvi-miR3632-3p	VIT_219s0027g01400.v2.1	2.5
vvi-miR3633a-5p	VIT_217s0000g04770.v2.1	2
vvi-miR3633a-5p	VIT_216s0022g00980.v2.1	2.5
vvi-miR3633a-5p	VIT_216s0022g00980.v2.1	2.5
vvi-miR3633a-5p	VIT_216s0022g00980.v2.1	2.5
vvi-miR3633a-5p	VIT_216s0022g00980.v2.1	2.5
vvi-miR3633a-5p	VIT_216s0022g00980.v2.1	2.5
vvi-miR3633a-5p	VIT_216s0022g00980.v2.1	2.5
vvi-miR3633a-5p	VIT_216s0022g00980.v2.1	2.5
vvi-miR3633a-5p	VIT_216s0022g00980.v2.1	2.5
vvi-miR3633a-5p	VIT_216s0022g00980.v2.1	2.5
vvi-miR3633a-5p	VIT_216s0022g00980.v2.1	2.5
vvi-miR3633a-5p	VIT_203s0017g01720.v2.1	2.5
vvi-miR3633a-5p	VIT_218s0001g07660.v2.1	2.5
vvi-miR3633a-5p	VIT_218s0001g07660.v2.1	2.5
vvi-miR3633a-5p	VIT_218s0001g07660.v2.1	2.5
vvi-miR3633a-5p	VIT_218s0001g07660.v2.1	2.5
vvi-miR3633a-5p	VIT_218s0001g07660.v2.1	2.5
vvi-miR3633a-5p	VIT_218s0001g07660.v2.1	2.5
vvi-miR3633a-5p	VIT_212s0028g01110.v2.1	2.2
vvi-miR3633a-5p	VIT_212s0028g01110.v2.1	2.2
vvi-miR3633a-5p	VIT_212s0028g01110.v2.1	2.2
vvi-miR3633a-5p	VIT_212s0028g01110.v2.1	2.2
vvi-miR3633a-5p	VIT_212s0028g01110.v2.1	2.2
vvi-miR3633a-5p	VIT_212s0028g01110.v2.1	2.2
vvi-miR3633a-5p	VIT_212s0028g01110.v2.1	2.2
vvi-miR3633a-5p	VIT_212s0028g01110.v2.1	2.2
vvi-miR3633a-5p	VIT_212s0028g01110.v2.1	2.2
vvi-miR3633a-5p	VIT_212s0028g01110.v2.1	2.2
vvi-miR3633a-5p	VIT_212s0028g01110.v2.1	2.2
vvi-miR3633a-5p	VIT_213s0074g00440.v2.1	2.5
vvi-miR3633a-5p	VIT_213s0074g00440.v2.1	2.5
vvi-miR3633a-5p	VIT_213s0074g00440.v2.1	2.5
vvi-miR3633a-5p	VIT_213s0074g00440.v2.1	2.5
vvi-miR3633a-5p	VIT_207s0031g01910.v2.1	2
vvi-miR3633a-5p	VIT_206s0009g03140.v2.1	2
vvi-miR3635-3p	VIT_217s0000g05850.v2.1	0
vvi-miR3635-3p	VIT_217s0000g05850.v2.1	0
vvi-miR3635-3p	VIT_217s0000g05850.v2.1	0
vvi-miR3635-3p	VIT_217s0000g05850.v2.1	0
vvi-miR3635-3p	VIT_217s0000g05850.v2.1	0
pab-miR396a-5p	VIT_217s0000g10090.v2.1	2.5
pab-miR396a-5p	VIT_217s0000g04440.v2.1	2
pab-miR396a-5p	VIT_217s0000g04440.v2.1	2
pab-miR396a-5p	VIT_217s0000g04440.v2.1	2
pab-miR396a-5p	VIT_218s0089g00100.v2.1	2.5
pab-miR396a-5p	VIT_218s0089g00100.v2.1	2.5
pab-miR396a-5p	VIT_218s0089g00100.v2.1	2.5
pab-miR396a-5p	VIT_218s0089g00100.v2.1	2.5
pab-miR396a-5p	VIT_218s0001g00640.v2.1	2.5
pab-miR396a-5p	VIT_212s0034g01980.v2.1	2.5
pab-miR396a-5p	VIT_212s0034g01980.v2.1	2.5
pab-miR396a-5p	VIT_212s0034g01980.v2.1	2.5
pab-miR396a-5p	VIT_202s0033g01260.v2.1	2
pab-miR396a-5p	VIT_200s0357g00120.v2.1	2.5
pab-miR396a-5p	VIT_213s0067g01210.v2.1	2.5
pab-miR396a-5p	VIT_207s0191g00220.v2.1	2
pab-miR396a-5p	VIT_207s0191g00220.v2.1	2
pab-miR396a-5p	VIT_207s0129g00280.v2.1	2.2
pab-miR396a-5p	VIT_211s0037g00130.v2.1	2.5
pab-miR396a-5p	VIT_209s0002g04250.v2.1	2.5
bra-miR5721	VIT_217s0000g06630.v2.1	2.5
bra-miR5721	VIT_207s0141g00450.v2.1	2
bra-miR5721	VIT_207s0095g00750.v2.1	2.2
bra-miR5721	VIT_207s0095g00750.v2.1	2.2
bra-miR5721	VIT_207s0095g00750.v2.1	2.2
bra-miR5721	VIT_219s0027g00240.v2.1	2.5
bra-miR5721	VIT_206s0061g00930.v2.1	2
bra-miR5721	VIT_204s0043g00870.v2.1	2.5
vun-miR482	VIT_218s0041g00270.v2.1	2
vun-miR482	VIT_218s0041g00270.v2.1	2
vun-miR482	VIT_200s0335g00080.v2.1	2
vun-miR482	VIT_213s0139g00270.v2.1	2.5
vun-miR482	VIT_207s0095g00040.v2.1	2
vun-miR482	VIT_219s0085g00440.v2.1	2.5
vun-miR482	VIT_213s0019g01120.v2.1	2
vun-miR482	VIT_204s0023g02380.v2.1	2.2
vun-miR2118	VIT_218s0001g05050.v2.1	2.5
vun-miR2118	VIT_208s0056g00240.v2.1	2.2
vun-miR2118	VIT_208s0056g00240.v2.1	2.2
vun-miR2118	VIT_203s0038g01540.v2.1	2
vun-miR2118	VIT_203s0038g01520.v2.1	2
vun-miR2118	VIT_203s0038g01530.v2.1	2
vun-miR2118	VIT_203s0088g00620.v2.1	2.5
vun-miR2118	VIT_218s0041g01750.v2.1	2
vun-miR2118	VIT_218s0041g01750.v2.1	2
vun-miR2118	VIT_218s0041g01750.v2.1	2
vun-miR2118	VIT_218s0089g00600.v2.1	2.2
vun-miR2118	VIT_215s0107g00290.v2.1	2.2
vun-miR2118	VIT_212s0034g01460.v2.1	2
vun-miR2118	VIT_200s0335g00080.v2.1	2.5
vun-miR2118	VIT_213s0139g00290.v2.1	2.5
vun-miR2118	VIT_213s0047g00095.v2.1	2.2
vun-miR2118	VIT_207s0005g06250.v2.1	2
vun-miR2118	VIT_207s0005g06200.v2.1	2
vun-miR2118	VIT_207s0005g06200.v2.1	2
vun-miR2118	VIT_207s0005g06210.v2.1	2.5
vun-miR2118	VIT_207s0095g00040.v2.1	2.5
vun-miR2118	VIT_219s0014g00920.v2.1	2.2
vun-miR2118	VIT_219s0014g00580.v2.1	2.2
vun-miR2118	VIT_206s0009g01630.v2.1	2.5
vun-miR2118	VIT_206s0009g01630.v2.1	2.5
vun-miR2118	VIT_206s0009g01630.v2.1	2.5
vun-miR2118	VIT_213s0019g01880.v2.1	2.5
vun-miR2118	VIT_213s0019g01950.v2.1	2.5
vun-miR2118	VIT_213s0019g01050.v2.1	2
vun-miR2118	VIT_209s0002g08300.v2.1	2.2
mes-miR159a-5p	VIT_204s0008g03250.v2.1	2.5
mes-miR159a-5p	VIT_204s0008g03250.v2.1	2.5
mes-miR159a-5p	VIT_204s0008g03250.v2.1	2.5
cca-miR396a-3p	VIT_201s0011g01220.v2.1	1.8
cca-miR396a-3p	VIT_218s0041g01620.v2.1	2.5
cca-miR396a-3p	VIT_215s0024g00350.v2.1	2.5
cca-miR396a-3p	VIT_205s0102g01100.v2.1	2.5
ptc-miR6476c	VIT_214s0036g01360.v2.1	2.5
ptc-miR6476c	VIT_214s0036g01360.v2.1	2.5
ptc-miR6476c	VIT_214s0036g01360.v2.1	2.5
ptc-miR6476c	VIT_214s0036g01360.v2.1	2.5
ptc-miR6476c	VIT_214s0068g01950.v2.1	2.2
ptc-miR6476c	VIT_214s0171g00220.v2.1	1.8
ptc-miR6476c	VIT_214s0171g00220.v2.1	1.8
ptc-miR6476c	VIT_208s0040g02935.v2.1	2.5
ptc-miR6476c	VIT_201s0026g00310.v2.1	2.5
ptc-miR6476c	VIT_212s0057g01515.v2.1	2.5
ptc-miR6476c	VIT_212s0057g00300.v2.1	2.5
ptc-miR6476c	VIT_210s0003g00420.v2.1	2.5
ptc-miR6476c	VIT_210s0003g00420.v2.1	2.5
ptc-miR6476c	VIT_210s0003g00420.v2.1	2.5
ptc-miR6476c	VIT_219s0090g00040.v2.1	2.5
ptc-miR6476c	VIT_219s0090g01490.v2.1	2.5
ptc-miR6476c	VIT_219s0090g01490.v2.1	2.5
ptc-miR6476c	VIT_219s0090g01490.v2.1	2.5
ptc-miR6476c	VIT_219s0090g01490.v2.1	2.5
ptc-miR6476c	VIT_206s0004g00955.v2.1	2.5
ptc-miR6476c	VIT_205s0124g00690.v2.1	2.5
ptc-miR6476c	VIT_205s0124g00670.v2.1	2.5
cpa-miR167c	VIT_206s0004g06810.v2.1	2.5
cpa-miR167c	VIT_211s0016g02400.v2.1	2.5
cpa-miR167c	VIT_211s0016g02400.v2.1	2.5
cpa-miR167c	VIT_211s0016g02400.v2.1	2.5
cpa-miR167c	VIT_211s0016g02400.v2.1	2.5
cpa-miR167c	VIT_211s0016g02400.v2.1	2.5
ath-miR8175	VIT_201s0011g00590.v2.1	2.2
ath-miR8175	VIT_203s0038g00760.v2.1	2.5
ath-miR8175	VIT_200s0317g00100.v2.1	2.5
ath-miR8175	VIT_200s0317g00100.v2.1	2.5
ath-miR8175	VIT_205s0062g01110.v2.1	2.2
sly-miR166c-3p	VIT_218s0075g00480.v2.1	2.5
sly-miR166c-3p	VIT_218s0075g00480.v2.1	2.5
sly-miR166c-3p	VIT_218s0075g00480.v2.1	2.5
sly-miR166c-3p	VIT_218s0075g00480.v2.1	2.5
sly-miR166c-3p	VIT_218s0075g00480.v2.1	2.5
sly-miR166c-3p	VIT_218s0075g00480.v2.1	2.5
sly-miR166c-3p	VIT_218s0075g00480.v2.1	2.5
sly-miR166c-3p	VIT_213s0019g04320.v2.1	1.8
sly-miR166c-3p	VIT_213s0019g04320.v2.1	1.8
sly-miR166c-3p	VIT_213s0019g04320.v2.1	1.8
sly-miR166c-3p	VIT_213s0019g04320.v2.1	1.8
sly-miR166c-3p	VIT_213s0019g04320.v2.1	1.8
sly-miR166c-3p	VIT_213s0019g04320.v2.1	1.8
sly-miR166c-3p	VIT_213s0019g04320.v2.1	1.8
sly-miR166c-3p	VIT_206s0004g02800.v2.1	1.8
sly-miR166c-3p	VIT_206s0004g02800.v2.1	1.8
sly-miR166c-3p	VIT_206s0004g02800.v2.1	1.8
sly-miR166c-3p	VIT_204s0008g03250.v2.1	1.8
sly-miR166c-3p	VIT_204s0008g03250.v2.1	1.8
sly-miR166c-3p	VIT_209s0002g03740.v2.1	1.2
lja-miR166-3p	VIT_208s0007g03420.v2.1	2.5
lja-miR166-3p	VIT_213s0019g04320.v2.1	2.5
lja-miR166-3p	VIT_213s0019g04320.v2.1	2.5
lja-miR166-3p	VIT_213s0019g04320.v2.1	2.5
lja-miR166-3p	VIT_213s0019g04320.v2.1	2.5
lja-miR166-3p	VIT_213s0019g04320.v2.1	2.5
lja-miR166-3p	VIT_213s0019g04320.v2.1	2.5
lja-miR166-3p	VIT_213s0019g04320.v2.1	2.5
lja-miR166-3p	VIT_210s0003g04670.v2.1	2.5
lja-miR166-3p	VIT_210s0003g04670.v2.1	2.5
lja-miR166-3p	VIT_210s0003g04670.v2.1	2.5
lja-miR166-3p	VIT_206s0004g02800.v2.1	2.5
lja-miR166-3p	VIT_206s0004g02800.v2.1	2.5
lja-miR166-3p	VIT_206s0004g02800.v2.1	2.5
lja-miR166-3p	VIT_204s0008g03250.v2.1	2.5
lja-miR166-3p	VIT_204s0008g03250.v2.1	2.5
lja-miR166-3p	VIT_209s0002g03740.v2.1	2.5
fve-miR159a-5p	VIT_201s0011g06470.v2.1	2
fve-miR159a-5p	VIT_201s0011g06470.v2.1	2
fve-miR159a-5p	VIT_201s0011g06470.v2.1	2
fve-miR159a-5p	VIT_201s0011g06470.v2.1	2
fve-miR159a-5p	VIT_201s0011g06470.v2.1	2
fve-miR159a-5p	VIT_201s0011g06140.v2.1	2.5
fve-miR159a-5p	VIT_203s0017g00990.v2.1	2.5
fve-miR159a-5p	VIT_203s0038g03200.v2.1	2.2
fve-miR159a-5p	VIT_203s0038g03200.v2.1	2.2
fve-miR159a-5p	VIT_203s0038g03200.v2.1	2.2
fve-miR159a-5p	VIT_215s0046g03160.v2.1	2
fve-miR159a-5p	VIT_210s0003g05840.v2.1	2
fve-miR159a-5p	VIT_210s0003g05840.v2.1	2
fve-miR159a-5p	VIT_219s0027g01140.v2.1	2.5
fve-miR159a-5p	VIT_206s0061g00410.v2.1	2.5
fve-miR159a-5p	VIT_206s0061g00410.v2.1	2.5
fve-miR159a-5p	VIT_206s0004g05480.v2.1	2.5
fve-miR159a-5p	VIT_206s0004g05480.v2.1	2.5
fve-miR162-5p	VIT_208s0007g08375.v2.1	2.5
fve-miR162-5p	VIT_207s0104g01770.v2.1	2.5
fve-miR162-5p	VIT_205s0102g00480.v2.1	2.5
fve-miR162-5p	VIT_205s0102g00480.v2.1	2.5
fve-miR162-3p	VIT_216s0022g02150.v2.1	2.5
fve-miR162-3p	VIT_216s0098g01880.v2.1	2.5
fve-miR162-3p	VIT_216s0098g01880.v2.1	2.5
fve-miR162-3p	VIT_216s0098g01880.v2.1	2.5
fve-miR162-3p	VIT_216s0098g01880.v2.1	2.5
fve-miR162-3p	VIT_216s0098g01880.v2.1	2.5
fve-miR162-3p	VIT_216s0098g01880.v2.1	2.5
fve-miR162-3p	VIT_206s0004g07230.v2.1	2.5
fve-miR162-3p	VIT_205s0094g00870.v2.1	2.5
pab-miR399c	VIT_213s0067g03280.v2.1	1.5
pab-miR11455	VIT_218s0166g00170.v2.1	2.5
pab-miR858b	VIT_201s0011g05020.v2.1	2.5
pab-miR858b	VIT_218s0001g05300.v2.1	2.5
pab-miR858b	VIT_218s0001g05300.v2.1	2.5
pab-miR858b	VIT_218s0001g05300.v2.1	2.5
pab-miR858b	VIT_212s0059g00700.v2.1	0.5
pab-miR858b	VIT_219s0090g00590.v2.1	2.2
pab-miR858b	VIT_211s0016g01300.v2.1	2
pab-miR858b	VIT_211s0016g05650.v2.1	2.5
pab-miR858b	VIT_211s0016g01310.v2.1	2.2
pab-miR858b	VIT_204s0008g01820.v2.1	2
pab-miR858b	VIT_204s0008g01870.v2.1	1.5
pab-miR858b	VIT_204s0008g01870.v2.1	1.5
pab-miR858b	VIT_204s0008g01810.v2.1	2
pab-miR858b	VIT_204s0008g01810.v2.1	2
pab-miR858b	VIT_209s0002g01400.v2.1	2.2
pab-miR858b	VIT_209s0002g01380.v2.1	1.8
pab-miR858b	VIT_205s0049g01020.v2.1	2.5
pab-miR858b	VIT_205s0049g01020.v2.1	2.5
cas-miR159b-3p	VIT_201s0011g01130.v2.1	2
cas-miR159b-3p	VIT_201s0011g01130.v2.1	2
cas-miR159b-3p	VIT_203s0063g01380.v2.1	2.5
cas-miR159b-3p	VIT_203s0063g01380.v2.1	2.5
cas-miR159b-3p	VIT_207s0151g01040.v2.1	2.5
cas-miR159b-3p	VIT_207s0151g01040.v2.1	2.5
cas-miR159b-3p	VIT_219s0090g00590.v2.1	2
cas-miR159b-3p	VIT_219s0014g01700.v2.1	2.5
cas-miR159b-3p	VIT_213s0067g01630.v2.1	2.2
cas-miR166a	VIT_214s0108g00480.v2.1	2
cas-miR166a	VIT_214s0108g00480.v2.1	2
cas-miR166a	VIT_214s0108g00480.v2.1	2
cas-miR166a	VIT_214s0108g00480.v2.1	2
cas-miR166a	VIT_218s0001g13350.v2.1	2.5
cas-miR166f-3p	VIT_218s0075g00480.v2.1	2.5
cas-miR166f-3p	VIT_218s0075g00480.v2.1	2.5
cas-miR166f-3p	VIT_218s0075g00480.v2.1	2.5
cas-miR166f-3p	VIT_218s0075g00480.v2.1	2.5
cas-miR166f-3p	VIT_218s0075g00480.v2.1	2.5
cas-miR166f-3p	VIT_218s0075g00480.v2.1	2.5
cas-miR166f-3p	VIT_218s0075g00480.v2.1	2.5
cas-miR166f-3p	VIT_213s0019g04320.v2.1	2.2
cas-miR166f-3p	VIT_213s0019g04320.v2.1	2.2
cas-miR166f-3p	VIT_213s0019g04320.v2.1	2.2
cas-miR166f-3p	VIT_213s0019g04320.v2.1	2.2
cas-miR166f-3p	VIT_213s0019g04320.v2.1	2.2
cas-miR166f-3p	VIT_213s0019g04320.v2.1	2.2
cas-miR166f-3p	VIT_213s0019g04320.v2.1	2.2
cas-miR166f-3p	VIT_210s0003g04670.v2.1	1.8
cas-miR166f-3p	VIT_210s0003g04670.v2.1	1.8
cas-miR166f-3p	VIT_210s0003g04670.v2.1	1.8
cas-miR166f-3p	VIT_206s0004g02800.v2.1	2.2
cas-miR166f-3p	VIT_206s0004g02800.v2.1	2.2
cas-miR166f-3p	VIT_206s0004g02800.v2.1	2.2
cas-miR166f-3p	VIT_204s0008g03250.v2.1	2.2
cas-miR166f-3p	VIT_204s0008g03250.v2.1	2.2
cas-miR166f-3p	VIT_209s0002g03740.v2.1	1.8
cas-miR169d	VIT_218s0001g00880.v2.1	2.5
cas-miR169d	VIT_208s0007g00730.v2.1	2.5
cas-miR169d	VIT_208s0007g00730.v2.1	2.5
cas-miR169d	VIT_208s0007g00730.v2.1	2.5
cas-miR169d	VIT_218s0072g00260.v2.1	2
cas-miR169d	VIT_204s0043g00610.v2.1	2.5
cas-miR169d	VIT_205s0049g00920.v2.1	1.8
cas-miR169d	VIT_205s0049g00920.v2.1	1.8
cas-miR169d	VIT_205s0049g00920.v2.1	1.8
cas-miR169d	VIT_205s0049g00920.v2.1	1.8
cas-miR169d	VIT_205s0049g00920.v2.1	1.8
cas-miR169f	VIT_218s0072g00260.v2.1	2.5
cas-miR169f	VIT_215s0046g00110.v2.1	2.5
cas-miR169f	VIT_215s0046g00110.v2.1	2.5
cas-miR169f	VIT_204s0043g00610.v2.1	2.5
cas-miR169f	VIT_205s0049g00920.v2.1	1.5
cas-miR169f	VIT_205s0049g00920.v2.1	1.5
cas-miR169f	VIT_205s0049g00920.v2.1	1.5
cas-miR169f	VIT_205s0049g00920.v2.1	1.5
cas-miR169f	VIT_205s0049g00920.v2.1	1.5
cas-miR169f	VIT_205s0049g00930.v2.1	2.5
cas-miR403	VIT_207s0005g01690.v2.1	1.5
mes-miR482b	VIT_217s0000g10080.v2.1	2.5
mes-miR482b	VIT_217s0000g10080.v2.1	2.5
mes-miR482b	VIT_217s0000g10080.v2.1	2.5
mes-miR482b	VIT_200s0335g00080.v2.1	2.5
mes-miR482b	VIT_207s0095g00040.v2.1	2.5
mes-miR482c	VIT_216s0022g01330.v2.1	2.5
mes-miR482c	VIT_215s0024g00400.v2.1	2
mes-miR482c	VIT_215s0024g00400.v2.1	2
mes-miR482c	VIT_215s0024g00400.v2.1	2
mes-miR482c	VIT_215s0024g00400.v2.1	2
mes-miR482c	VIT_215s0024g00400.v2.1	2
mes-miR482c	VIT_202s0025g00980.v2.1	2.5
mes-miR482c	VIT_213s0158g00400.v2.1	1
mes-miR482c	VIT_211s0037g01270.v2.1	2
mes-miR482c	VIT_209s0002g03880.v2.1	2.5
mes-miR482c	VIT_209s0002g03880.v2.1	2.5
mes-miR482c	VIT_209s0002g03880.v2.1	2.5
mes-miR482c	VIT_209s0002g03790.v2.1	1.5
csi-miR159c-3p	VIT_213s0067g01630.v2.1	2
csi-miR396f-5p	VIT_217s0000g04440.v2.1	2.5
csi-miR396f-5p	VIT_217s0000g04440.v2.1	2.5
csi-miR396f-5p	VIT_217s0000g04440.v2.1	2.5
csi-miR396f-5p	VIT_212s0035g01770.v2.1	2.5
csi-miR396f-5p	VIT_212s0057g01320.v2.1	2.2
csi-miR396f-5p	VIT_212s0057g01320.v2.1	2.2
csi-miR396f-5p	VIT_202s0025g00280.v2.1	2.5
csi-miR396f-5p	VIT_202s0025g00280.v2.1	2.5
csi-miR396f-5p	VIT_202s0025g00280.v2.1	2.5
csi-miR396f-5p	VIT_202s0025g00280.v2.1	2.5
csi-miR396f-5p	VIT_202s0025g00280.v2.1	2.5
csi-miR396f-5p	VIT_202s0025g00280.v2.1	2.5
csi-miR396f-5p	VIT_202s0033g01260.v2.1	2.2
csi-miR396f-5p	VIT_200s0304g00060.v2.1	2.2
csi-miR396f-5p	VIT_200s0179g00260.v2.1	2.5
csi-miR396f-5p	VIT_210s0597g00040.v2.1	2.5
csi-miR396f-5p	VIT_207s0005g03870.v2.1	2
csi-miR396f-5p	VIT_207s0191g00220.v2.1	1.5
csi-miR396f-5p	VIT_207s0191g00220.v2.1	1.5
csi-miR396f-5p	VIT_207s0005g03860.v2.1	2
csi-miR396f-5p	VIT_207s0005g03860.v2.1	2
csi-miR396f-5p	VIT_206s0009g02740.v2.1	2.5
csi-miR396f-5p	VIT_211s0037g00130.v2.1	2.5
csi-miR403b-3p	VIT_207s0005g01690.v2.1	1.5
csi-miR477e-5p	VIT_201s0010g02270.v2.1	1.5
csi-miR477e-5p	VIT_217s0000g10300.v2.1	1.5
csi-miR477e-5p	VIT_217s0000g07780.v2.1	2.5
csi-miR477e-5p	VIT_217s0000g07780.v2.1	2.5
csi-miR477e-5p	VIT_217s0000g07780.v2.1	2.5
csi-miR477e-5p	VIT_217s0000g07780.v2.1	2.5
csi-miR477e-5p	VIT_216s0050g02000.v2.1	2.2
csi-miR477e-5p	VIT_218s0001g13060.v2.1	2.5
csi-miR477e-5p	VIT_215s0045g00530.v2.1	2.5
csi-miR477e-5p	VIT_215s0045g00530.v2.1	2.5
aof-miR156a	VIT_218s0122g00570.v2.1	2.2
aof-miR156a	VIT_214s0068g01780.v2.1	1.5
aof-miR156a	VIT_208s0007g06270.v2.1	1
aof-miR156a	VIT_201s0010g03910.v2.1	1
aof-miR156a	VIT_201s0010g03910.v2.1	1
aof-miR156a	VIT_201s0010g03910.v2.1	1
aof-miR156a	VIT_201s0010g01310.v2.1	2.5
aof-miR156a	VIT_201s0010g01310.v2.1	2.5
aof-miR156a	VIT_201s0011g00130.v2.1	1
aof-miR156a	VIT_201s0011g00130.v2.1	1
aof-miR156a	VIT_201s0010g03710.v2.1	1
aof-miR156a	VIT_201s0010g03710.v2.1	1
aof-miR156a	VIT_201s0010g03710.v2.1	1
aof-miR156a	VIT_201s0010g03710.v2.1	1
aof-miR156a	VIT_201s0010g03710.v2.1	1
aof-miR156a	VIT_201s0010g03710.v2.1	1
aof-miR156a	VIT_217s0000g01260.v2.1	1
aof-miR156a	VIT_217s0000g05020.v2.1	1
aof-miR156a	VIT_217s0000g05020.v2.1	1
aof-miR156a	VIT_217s0000g05020.v2.1	1
aof-miR156a	VIT_215s0021g02280.v2.1	2.5
aof-miR156a	VIT_215s0021g02290.v2.1	1
aof-miR156a	VIT_219s0090g01180.v2.1	1
aof-miR156a	VIT_219s0090g01180.v2.1	1
aof-miR156a	VIT_206s0004g00110.v2.1	2
aof-miR156a	VIT_206s0004g00110.v2.1	2
aof-miR156a	VIT_206s0004g00110.v2.1	2
aof-miR156a	VIT_211s0065g00170.v2.1	1
aof-miR156a	VIT_211s0065g00170.v2.1	1
aof-miR156a	VIT_211s0065g00170.v2.1	1
aof-miR156a	VIT_211s0065g00170.v2.1	1
aof-miR156a	VIT_211s0065g00170.v2.1	1
aof-miR156a	VIT_211s0065g00170.v2.1	1
aof-miR156a	VIT_211s0037g01324.v2.1	2
aof-miR156a	VIT_209s0002g08830.v2.1	2.5
aof-miR159	VIT_201s0011g01130.v2.1	2.5
aof-miR159	VIT_201s0011g01130.v2.1	2.5
aof-miR159	VIT_203s0017g01375.v2.1	2.5
aof-miR159	VIT_203s0017g01800.v2.1	2.5
aof-miR159	VIT_212s0059g01070.v2.1	2.5
aof-miR159	VIT_212s0059g01070.v2.1	2.5
aof-miR159	VIT_219s0090g00590.v2.1	2
aof-miR159	VIT_219s0014g01700.v2.1	2
aof-miR159	VIT_211s0016g04940.v2.1	2.5
aof-miR159	VIT_211s0016g04940.v2.1	2.5
aof-miR159	VIT_213s0067g01630.v2.1	1.8
aof-miR159	VIT_209s0002g02770.v2.1	2.5
aof-miR166a	VIT_218s0075g00480.v2.1	1.5
aof-miR166a	VIT_218s0075g00480.v2.1	1.5
aof-miR166a	VIT_218s0075g00480.v2.1	1.5
aof-miR166a	VIT_218s0075g00480.v2.1	1.5
aof-miR166a	VIT_218s0075g00480.v2.1	1.5
aof-miR166a	VIT_218s0075g00480.v2.1	1.5
aof-miR166a	VIT_218s0075g00480.v2.1	1.5
aof-miR166a	VIT_213s0019g04320.v2.1	2.2
aof-miR166a	VIT_213s0019g04320.v2.1	2.2
aof-miR166a	VIT_213s0019g04320.v2.1	2.2
aof-miR166a	VIT_213s0019g04320.v2.1	2.2
aof-miR166a	VIT_213s0019g04320.v2.1	2.2
aof-miR166a	VIT_213s0019g04320.v2.1	2.2
aof-miR166a	VIT_213s0019g04320.v2.1	2.2
aof-miR166a	VIT_210s0003g04670.v2.1	2.2
aof-miR166a	VIT_210s0003g04670.v2.1	2.2
aof-miR166a	VIT_210s0003g04670.v2.1	2.2
aof-miR166a	VIT_206s0004g02800.v2.1	2.2
aof-miR166a	VIT_206s0004g02800.v2.1	2.2
aof-miR166a	VIT_206s0004g02800.v2.1	2.2
aof-miR166a	VIT_204s0008g03250.v2.1	2.2
aof-miR166a	VIT_204s0008g03250.v2.1	2.2
aof-miR166a	VIT_209s0002g03740.v2.1	2
aof-miR166d	VIT_218s0075g00480.v2.1	2.5
aof-miR166d	VIT_218s0075g00480.v2.1	2.5
aof-miR166d	VIT_218s0075g00480.v2.1	2.5
aof-miR166d	VIT_218s0075g00480.v2.1	2.5
aof-miR166d	VIT_218s0075g00480.v2.1	2.5
aof-miR166d	VIT_218s0075g00480.v2.1	2.5
aof-miR166d	VIT_218s0075g00480.v2.1	2.5
aof-miR166d	VIT_213s0019g04320.v2.1	1.8
aof-miR166d	VIT_213s0019g04320.v2.1	1.8
aof-miR166d	VIT_213s0019g04320.v2.1	1.8
aof-miR166d	VIT_213s0019g04320.v2.1	1.8
aof-miR166d	VIT_213s0019g04320.v2.1	1.8
aof-miR166d	VIT_213s0019g04320.v2.1	1.8
aof-miR166d	VIT_213s0019g04320.v2.1	1.8
aof-miR166d	VIT_210s0003g04670.v2.1	1.8
aof-miR166d	VIT_210s0003g04670.v2.1	1.8
aof-miR166d	VIT_210s0003g04670.v2.1	1.8
aof-miR166d	VIT_206s0004g02800.v2.1	1.8
aof-miR166d	VIT_206s0004g02800.v2.1	1.8
aof-miR166d	VIT_206s0004g02800.v2.1	1.8
aof-miR166d	VIT_204s0008g03250.v2.1	1.8
aof-miR166d	VIT_204s0008g03250.v2.1	1.8
aof-miR166d	VIT_209s0002g03740.v2.1	1.2
aof-miR167c	VIT_210s0003g01430.v2.1	2.5
aof-miR167c	VIT_211s0016g02400.v2.1	2
aof-miR167c	VIT_211s0016g02400.v2.1	2
aof-miR167c	VIT_211s0016g02400.v2.1	2
aof-miR167c	VIT_211s0016g02400.v2.1	2
aof-miR167c	VIT_211s0016g02400.v2.1	2
aof-miR390	VIT_216s0098g01090.v2.1	1.5
aof-miR390	VIT_210s0003g01880.v2.1	2.5
aof-miR390	VIT_210s0003g01890.v2.1	2
aof-miR390	VIT_206s0004g01080.v2.1	2.2
aof-miR390	VIT_206s0009g01210.v2.1	2.5
aof-miR390	VIT_206s0009g01210.v2.1	2.5
aof-miR390	VIT_211s0016g00640.v2.1	2.5
aof-miR390	VIT_211s0016g00640.v2.1	2.5
aof-miR396b	VIT_214s0081g00150.v2.1	2.5
aof-miR396b	VIT_208s0032g00740.v2.1	2.5
aof-miR396b	VIT_201s0146g00490.v2.1	2.5
aof-miR396b	VIT_201s0146g00490.v2.1	2.5
aof-miR396b	VIT_217s0000g04440.v2.1	2.2
aof-miR396b	VIT_217s0000g04440.v2.1	2.2
aof-miR396b	VIT_217s0000g04440.v2.1	2.2
aof-miR396b	VIT_202s0033g01260.v2.1	2.2
aof-miR396b	VIT_200s0304g00060.v2.1	2.2
aof-miR396b	VIT_207s0191g00220.v2.1	2
aof-miR396b	VIT_207s0191g00220.v2.1	2
aof-miR396b	VIT_206s0004g00080.v2.1	2.2
aof-miR396b	VIT_211s0037g00130.v2.1	2
aof-miR396b	VIT_204s0008g00915.v2.1	2.5
aof-miR408	VIT_216s0039g00570.v2.1	2
aof-miR408	VIT_218s0001g15240.v2.1	0.8
aof-miR408	VIT_212s0034g01140.v2.1	2.2
aof-miR408	VIT_212s0034g01150.v2.1	2
aof-miR408	VIT_200s1450g00005.v2.1	2.5
aof-miR408	VIT_210s0003g03290.v2.1	2.5
aof-miR408	VIT_207s0005g06460.v2.1	2.2
aof-miR408	VIT_206s0061g00030.v2.1	2.5
aof-miR408	VIT_206s0061g00030.v2.1	2.5
aof-miR408	VIT_206s0004g07420.v2.1	2.5
aof-miR5139a	VIT_202s0012g00320.v2.1	2.5
aof-miR5139a	VIT_200s0181g00020.v2.1	2.5
aof-miR5139a	VIT_207s0005g04070.v2.1	2.5
aof-miR5139a	VIT_207s0005g03240.v2.1	2.5
aof-miR5139a	VIT_219s0093g00410.v2.1	1.5
aof-miR535	VIT_201s0026g02490.v2.1	2
aof-miR535	VIT_201s0026g02490.v2.1	2
aof-miR535	VIT_200s0358g00010.v2.1	1
aof-miR535	VIT_207s0104g00030.v2.1	2
aof-miR535	VIT_205s0051g00930.v2.1	2
aof-miR535	VIT_205s0051g00930.v2.1	2
aof-miR535	VIT_205s0051g00930.v2.1	2
aof-miR535	VIT_205s0051g00930.v2.1	2
aof-miR535	VIT_205s0051g00930.v2.1	2
aof-miR535	VIT_205s0051g00930.v2.1	2
aof-miR535	VIT_205s0051g00930.v2.1	2
aof-miR535	VIT_205s0051g00930.v2.1	2

## Sheet: Supplementary Table S10
Supplementary Table S10. Target gene prediction of novel miRNA
Novel-miRNA	Score	target genes
>vvi-m1696-5p	Score: 0.5	VIT_201s0010g02270.v2.1
Query: 1 TCCCTCAAAGGCTTCCAAT-TT 21
|||||||||||||||||||*||
Sbjct: 798 AGGGAGTTTCCGAAGGTTATAA 777
>vvi-m1696-5p	Score: 0.5	VIT_217s0000g10300.v2.1
Query: 1 TCCCTCAAAGGCTTCCAAT-TT 21
|||||||||||||||||||*||
Sbjct: 768 AGGGAGTTTCCGAAGGTTATAA 747
>vvi-m1696-5p	Score: 2.5	VIT_216s0050g02000.v2.1
Query: 1 TCCCTCAAAGGCTTCCAATTT 21
|||||||||:||||*||*|*|
Sbjct: 87 AGGGAGTTTTCGAACGTCACA 67
>vvi-m1696-5p	Score: 2.5	VIT_206s0004g07700.v2.1
Query: 1 TCCCTCAAAGGCTTCCAATTT 21
|*|||||||||||||*|||*|
Sbjct: 309 AAGGAGTTTCCGAAGATTATA 289
>vvi-m1696-5p	Score: 2.5	VIT_206s0004g07700.v2.1
Query: 1 TCCCTCAAAGGCTTCCAATTT 21
|*|||||||||||||*|||*|
Sbjct: 306 AAGGAGTTTCCGAAGATTATA 286
>vvi-m1696-5p	Score: 2.5	VIT_206s0004g07700.v2.1
Query: 1 TCCCTCAAAGGCTTCCAATTT 21
|*|||||||||||||*|||*|
Sbjct: 294 AAGGAGTTTCCGAAGATTATA 274
>vvi-m1696-5p	Score: 2.5	VIT_206s0004g07700.v2.1
Query: 1 TCCCTCAAAGGCTTCCAATTT 21
|*|||||||||||||*|||*|
Sbjct: 309 AAGGAGTTTCCGAAGATTATA 289
>vvi-m1696-5p	Score: 2.5	VIT_204s0069g00780.v2.1
Query: 1 TCCCTCAAAGGCTTCCAATTT 21
||||||||*:*||||||||||
Sbjct: 666 AGGGAGTTGTAGAAGGTTAAA 646
>vvi-m1696-5p	Score: 2.5	VIT_204s0069g00780.v2.1
Query: 1 TCCCTCAAAGGCTTCCAATTT 21
||||||||*:*||||||||||
Sbjct: 666 AGGGAGTTGTAGAAGGTTAAA 646
>vvi-m1696-5p	Score: 2.5	VIT_204s0069g00780.v2.1
Query: 1 TCCCTCAAAGGCTTCCAATTT 21
||||||||*:*||||||||||
Sbjct: 666 AGGGAGTTGTAGAAGGTTAAA 646
>vvi-m1696-5p	Score: 2.5	VIT_204s0069g00780.v2.1
Query: 1 TCCCTCAAAGGCTTCCAATTT 21
||||||||*:*||||||||||
Sbjct: 666 AGGGAGTTGTAGAAGGTTAAA 646
>vvi-m1696-5p	Score: 2.5	VIT_204s0069g00780.v2.1
Query: 1 TCCCTCAAAGGCTTCCAATTT 21
||||||||*:*||||||||||
Sbjct: 666 AGGGAGTTGTAGAAGGTTAAA 646
>vvi-m1696-5p	Score: 2.5	VIT_205s0051g00340.v2.1
Query: 1 TCCCTCAAAGGCTTCCAATTT 21
:|||||||*::|||||||||:
Sbjct: 669 GGGGAGTTGTTGAAGGTTAAG 649
>vvi-m1784-5p	Score: 0.5	VIT_201s0010g02270.v2.1
Query: 1 TCCCTCAAAGGCTTCCAAT-TT 21
|||||||||||||||||||*||
Sbjct: 798 AGGGAGTTTCCGAAGGTTATAA 777
>vvi-m1784-5p	Score: 0.5	VIT_217s0000g10300.v2.1
Query: 1 TCCCTCAAAGGCTTCCAAT-TT 21
|||||||||||||||||||*||
Sbjct: 768 AGGGAGTTTCCGAAGGTTATAA 747
>vvi-m1784-5p	Score: 2.5	VIT_216s0050g02000.v2.1
Query: 1 TCCCTCAAAGGCTTCCAATTT 21
|||||||||:||||*||*|*|
Sbjct: 87 AGGGAGTTTTCGAACGTCACA 67
>vvi-m1784-5p	Score: 2.5	VIT_206s0004g07700.v2.1
Query: 1 TCCCTCAAAGGCTTCCAATTT 21
|*|||||||||||||*|||*|
Sbjct: 309 AAGGAGTTTCCGAAGATTATA 289
>vvi-m1784-5p	Score: 2.5	VIT_206s0004g07700.v2.1
Query: 1 TCCCTCAAAGGCTTCCAATTT 21
|*|||||||||||||*|||*|
Sbjct: 306 AAGGAGTTTCCGAAGATTATA 286
>vvi-m1784-5p	Score: 2.5	VIT_206s0004g07700.v2.1
Query: 1 TCCCTCAAAGGCTTCCAATTT 21
|*|||||||||||||*|||*|
Sbjct: 294 AAGGAGTTTCCGAAGATTATA 274
>vvi-m1784-5p	Score: 2.5	VIT_206s0004g07700.v2.1
Query: 1 TCCCTCAAAGGCTTCCAATTT 21
|*|||||||||||||*|||*|
Sbjct: 309 AAGGAGTTTCCGAAGATTATA 289
>vvi-m1784-5p	Score: 2.5	VIT_204s0069g00780.v2.1
Query: 1 TCCCTCAAAGGCTTCCAATTT 21
||||||||*:*||||||||||
Sbjct: 666 AGGGAGTTGTAGAAGGTTAAA 646
>vvi-m1784-5p	Score: 2.5	VIT_204s0069g00780.v2.1
Query: 1 TCCCTCAAAGGCTTCCAATTT 21
||||||||*:*||||||||||
Sbjct: 666 AGGGAGTTGTAGAAGGTTAAA 646
>vvi-m1784-5p	Score: 2.5	VIT_204s0069g00780.v2.1
Query: 1 TCCCTCAAAGGCTTCCAATTT 21
||||||||*:*||||||||||
Sbjct: 666 AGGGAGTTGTAGAAGGTTAAA 646
>vvi-m1784-5p	Score: 2.5	VIT_204s0069g00780.v2.1
Query: 1 TCCCTCAAAGGCTTCCAATTT 21
||||||||*:*||||||||||
Sbjct: 666 AGGGAGTTGTAGAAGGTTAAA 646
>vvi-m1784-5p	Score: 2.5	VIT_204s0069g00780.v2.1
Query: 1 TCCCTCAAAGGCTTCCAATTT 21
||||||||*:*||||||||||
Sbjct: 666 AGGGAGTTGTAGAAGGTTAAA 646
>vvi-m1784-5p	Score: 2.5	VIT_205s0051g00340.v2.1
Query: 1 TCCCTCAAAGGCTTCCAATTT 21
:|||||||*::|||||||||:
Sbjct: 669 GGGGAGTTGTTGAAGGTTAAG 649
>vvi-m1784-3p	Score: 2.0	VIT_217s0000g02070.v2.1
Query: 1 GTTGGAAGTCGGTGGGGGACC 21
*|||||||:||||||:|*|||
Sbjct: 154 GAACCTTCGGCCACCTC-TGG 135
>vvi-m1784-3p	Score: 2.0	VIT_217s0000g02070.v2.1
Query: 1 GTTGGAAGTCGGTGGGGGACC 21
*|||||||:||||||:|*|||
Sbjct: 154 GAACCTTCGGCCACCTC-TGG 135
>vvi-m1784-3p	Score: 2.0	VIT_217s0000g02070.v2.1
Query: 1 GTTGGAAGTCGGTGGGGGACC 21
*|||||||:||||||:|*|||
Sbjct: 154 GAACCTTCGGCCACCTC-TGG 135
>vvi-m1901-5p	Score: 0.5	VIT_201s0010g02270.v2.1	Vitis riparia GRAS family protein RAM1-like (LOC117923228), mRNA
Query: 1 TCCCTCAAAGGCTTCCAAT-TT 21
|||||||||||||||||||*||
Sbjct: 798 AGGGAGTTTCCGAAGGTTATAA 777
>vvi-m1901-5p	Score: 0.5	VIT_217s0000g10300.v2.1
Query: 1 TCCCTCAAAGGCTTCCAAT-TT 21
|||||||||||||||||||*||
Sbjct: 768 AGGGAGTTTCCGAAGGTTATAA 747
>vvi-m1901-5p	Score: 2.5	VIT_216s0050g02000.v2.1
Query: 1 TCCCTCAAAGGCTTCCAATTT 21
|||||||||:||||*||*|*|
Sbjct: 87 AGGGAGTTTTCGAACGTCACA 67
>vvi-m1901-5p	Score: 2.5	VIT_206s0004g07700.v2.1
Query: 1 TCCCTCAAAGGCTTCCAATTT 21
|*|||||||||||||*|||*|
Sbjct: 309 AAGGAGTTTCCGAAGATTATA 289
>vvi-m1901-5p	Score: 2.5	VIT_206s0004g07700.v2.1
Query: 1 TCCCTCAAAGGCTTCCAATTT 21
|*|||||||||||||*|||*|
Sbjct: 306 AAGGAGTTTCCGAAGATTATA 286
>vvi-m1901-5p	Score: 2.5	VIT_206s0004g07700.v2.1
Query: 1 TCCCTCAAAGGCTTCCAATTT 21
|*|||||||||||||*|||*|
Sbjct: 294 AAGGAGTTTCCGAAGATTATA 274
>vvi-m1901-5p	Score: 2.5	VIT_206s0004g07700.v2.1
Query: 1 TCCCTCAAAGGCTTCCAATTT 21
|*|||||||||||||*|||*|
Sbjct: 309 AAGGAGTTTCCGAAGATTATA 289
>vvi-m1901-5p	Score: 2.5	VIT_204s0069g00780.v2.1
Query: 1 TCCCTCAAAGGCTTCCAATTT 21
||||||||*:*||||||||||
Sbjct: 666 AGGGAGTTGTAGAAGGTTAAA 646
>vvi-m1901-5p	Score: 2.5	VIT_204s0069g00780.v2.1
Query: 1 TCCCTCAAAGGCTTCCAATTT 21
||||||||*:*||||||||||
Sbjct: 666 AGGGAGTTGTAGAAGGTTAAA 646
>vvi-m1901-5p	Score: 2.5	VIT_204s0069g00780.v2.1
Query: 1 TCCCTCAAAGGCTTCCAATTT 21
||||||||*:*||||||||||
Sbjct: 666 AGGGAGTTGTAGAAGGTTAAA 646
>vvi-m1901-5p	Score: 2.5	VIT_204s0069g00780.v2.1
Query: 1 TCCCTCAAAGGCTTCCAATTT 21
||||||||*:*||||||||||
Sbjct: 666 AGGGAGTTGTAGAAGGTTAAA 646
>vvi-m1901-5p	Score: 2.5	VIT_204s0069g00780.v2.1
Query: 1 TCCCTCAAAGGCTTCCAATTT 21
||||||||*:*||||||||||
Sbjct: 666 AGGGAGTTGTAGAAGGTTAAA 646
>vvi-m1901-5p	Score: 2.5	VIT_205s0051g00340.v2.1
Query: 1 TCCCTCAAAGGCTTCCAATTT 21
:|||||||*::|||||||||:
Sbjct: 669 GGGGAGTTGTTGAAGGTTAAG 649
>vvi-m2634-5p	Score: 2.2	VIT_201s0011g00550.v2.1
Query: 1 TTTGTTGCTGGTCATCTAGTCA 22
:|||||||||:|*||||*||||
Sbjct: 858 GAACAACGACTAATAGACCAGT 837
>vvi-m2634-5p	Score: 2.2	VIT_201s0011g00550.v2.1
Query: 1 TTTGTTGCTGGTCATCTAGTCA 22
:|||||||||:|*||||*||||
Sbjct: 858 GAACAACGACTAATAGACCAGT 837
>vvi-m2634-5p	Score: 2.2	VIT_201s0011g00550.v2.1
Query: 1 TTTGTTGCTGGTCATCTAGTCA 22
:|||||||||:|*||||*||||
Sbjct: 858 GAACAACGACTAATAGACCAGT 837
>vvi-m2634-5p	Score: 2.2	VIT_201s0011g00550.v2.1
Query: 1 TTTGTTGCTGGTCATCTAGTCA 22
:|||||||||:|*||||*||||
Sbjct: 858 GAACAACGACTAATAGACCAGT 837
>vvi-m2634-5p	Score: 2.2	VIT_201s0011g00550.v2.1
Query: 1 TTTGTTGCTGGTCATCTAGTCA 22
:|||||||||:|*||||*||||
Sbjct: 858 GAACAACGACTAATAGACCAGT 837
>vvi-m2634-5p	Score: 2.2	VIT_201s0011g00550.v2.1
Query: 1 TTTGTTGCTGGTCATCTAGTCA 22
:|||||||||:|*||||*||||
Sbjct: 858 GAACAACGACTAATAGACCAGT 837
>vvi-m2634-3p	Score: 2.2	VIT_208s0040g01680.v2.1
Query: 1 TAGATGATCATCAACAAACACA 22
:||||||||||*|||||*||*|
Sbjct: 768 GTCTACTAGTAATTGTT-GTCT 748
>vvi-m2634-3p	Score: 2.5	VIT_201s0010g01770.v2.1
Query: 1 TAGATGATCATCAACAAACACA 22
*||||*|||||||||||**|||
Sbjct: 978 CTCTAGTAGTAGTTGTTCCTGT 957
>vvi-m2634-3p	Score: 2.5	VIT_201s0010g01770.v2.1
Query: 1 TAGATGATCATCAACAAACACA 22
*||||*|||||||||||**|||
Sbjct: 813 CTCTAGTAGTAGTTGTTCCTGT 792
>vvi-m2634-3p	Score: 2.5	VIT_218s0001g11240.v2.1
Query: 1 TAGATGATCATCAACAAACACA 22
*|:||||||||||||||***||
Sbjct: 1290 TTTTACTAGTAGTTGTTAAAGT 1269
>vvi-m2634-3p	Score: 2.5	VIT_218s0001g11240.v2.1
Query: 1 TAGATGATCATCAACAAACACA 22
*|:||||||||||||||***||
Sbjct: 1290 TTTTACTAGTAGTTGTTAAAGT 1269
>vvi-m2634-3p	Score: 2.5	VIT_218s0001g11240.v2.1
Query: 1 TAGATGATCATCAACAAACACA 22
*|:||||||||||||||***||
Sbjct: 846 TTTTACTAGTAGTTGTTAAAGT 825
>vvi-m2634-3p	Score: 2.5	VIT_202s0025g02530.v2.1
Query: 1 TAGATGATCATCAACAAACACA 22
*|||*||||||||||||*||*|
Sbjct: 74 TTCTTCTAGTAGTTGTT-GTTT 54
>vvi-m2634-3p	Score: 2.5	VIT_210s0116g01770.v2.1
Query: 1 TAGATGATCATCAACAAACACA 22
|||||*||||:||||||*|||*
Sbjct: 1626 ATCTAGTAGTGGTTGTT-GTGA 1606
>vvi-m2634-3p	Score: 2.5	VIT_210s0116g01770.v2.1
Query: 1 TAGATGATCATCAACAAACACA 22
|||||*||||:||||||*|||*
Sbjct: 1626 ATCTAGTAGTGGTTGTT-GTGA 1606
>vvi-m2634-3p	Score: 2.5	VIT_210s0116g01770.v2.1
Query: 1 TAGATGATCATCAACAAACACA 22
|||||*||||:||||||*|||*
Sbjct: 1626 ATCTAGTAGTGGTTGTT-GTGA 1606
>vvi-m2634-3p	Score: 2.5	VIT_210s0116g01770.v2.1
Query: 1 TAGATGATCATCAACAAACACA 22
|||||*||||:||||||*|||*
Sbjct: 846 ATCTAGTAGTGGTTGTT-GTGA 826
>vvi-m2634-3p	Score: 2.5	VIT_210s0116g01770.v2.1
Query: 1 TAGATGATCATCAACAAACACA 22
|||||*||||:||||||*|||*
Sbjct: 846 ATCTAGTAGTGGTTGTT-GTGA 826
>vvi-m2634-3p	Score: 2.5	VIT_210s0116g01770.v2.1
Query: 1 TAGATGATCATCAACAAACACA 22
|||||*||||:||||||*|||*
Sbjct: 846 ATCTAGTAGTGGTTGTT-GTGA 826
>vvi-m3503-3p	Score: 2.5	VIT_213s0019g04820.v2.1
Query: 1 AGATGGCGTGCTCTCAGGCTTG 22
||*||||:||||||||::|||:
Sbjct: 1800 TCCACCGTACGAGAGTTTGAAT 1779
>vvi-m3503-3p	Score: 2.5	VIT_213s0019g04820.v2.1
Query: 1 AGATGGCGTGCTCTCAGGCTTG 22
||*||||:||||||||::|||:
Sbjct: 1800 TCCACCGTACGAGAGTTTGAAT 1779
>vvi-m3503-3p	Score: 2.5	VIT_213s0019g04820.v2.1
Query: 1 AGATGGCGTGCTCTCAGGCTTG 22
||*||||:||||||||::|||:
Sbjct: 1800 TCCACCGTACGAGAGTTTGAAT 1779
>vvi-m3503-3p	Score: 2.5	VIT_213s0019g04820.v2.1
Query: 1 AGATGGCGTGCTCTCAGGCTTG 22
||*||||:||||||||::|||:
Sbjct: 1800 TCCACCGTACGAGAGTTTGAAT 1779

## Sheet: Supplementary Table S11
Supplementary Table 11. KEEG pathway classification of target genes predicted by differential expression of miRNA
PathwayID	Pathway	Level1	Level2	list_number	total_number	Pvalue	FDR	Gene	URL	Category_x000D_
vvi04075	Plant hormone signal transduction	Environmental Information Processing	Signal transduction	5	263	0.0578644	0.448456	VIT_200s0357g00120.v2.1(VIT_200s0357g00120.v2.1),VIT_212s0028g01110.v2.1(VIT_212s0028g01110.v2.1),VIT_208s0007g03420.v2.1(VIT_208s0007g03420.v2.1),VIT_211s0016g00640.v2.1(VIT_211s0016g00640.v2.1),VIT_210s0003g00420.v2.1(VIT_210s0003g00420.v2.1)	http://www.kegg.jp/kegg-bin/show_pathway?map04075/K14514%09%23FFFFFF,red/K14432%09%23FFFFFF,red/K16189%09%23FFFFFF,red/K14486%09%23FFFFFF,red/	Environmental Information Processing_x000D_
vvi04016	MAPK signaling pathway - plant	Environmental Information Processing	Signal transduction	1	97	0.548309	0.670754	VIT_200s0357g00120.v2.1(VIT_200s0357g00120.v2.1)	http://www.kegg.jp/kegg-bin/show_pathway?map04016/K14514%09%23FFFFFF,red/	Environmental Information Processing_x000D_
vvi03030	DNA replication	Genetic Information Processing	Replication and repair	2	48	0.056675	0.448456	VIT_215s0045g00530.v2.1(VIT_215s0045g00530.v2.1),VIT_205s0051g00930.v2.1(VIT_205s0051g00930.v2.1)	http://www.kegg.jp/kegg-bin/show_pathway?map03030/K10756%09%23FFFFFF,red/K02685%09%23FFFFFF,red/	Genetic Information Processing_x000D_
vvi03450	Non-homologous end-joining	Genetic Information Processing	Replication and repair	1	10	0.0779236	0.448456	VIT_215s0048g00940.v2.1(VIT_215s0048g00940.v2.1)	http://www.kegg.jp/kegg-bin/show_pathway?map03450/K10885%09%23FFFFFF,red/	Genetic Information Processing_x000D_
vvi03430	Mismatch repair	Genetic Information Processing	Replication and repair	1	38	0.266011	0.670754	VIT_215s0045g00530.v2.1(VIT_215s0045g00530.v2.1)	http://www.kegg.jp/kegg-bin/show_pathway?map03430/K10756%09%23FFFFFF,red/	Genetic Information Processing_x000D_
vvi03050	Proteasome	Genetic Information Processing	Folding, sorting and degradation	1	53	0.350838	0.670754	VIT_206s0004g08220.v2.1(VIT_206s0004g08220.v2.1)	http://www.kegg.jp/kegg-bin/show_pathway?map03050/K03063%09%23FFFFFF,red/	Genetic Information Processing_x000D_
vvi03420	Nucleotide excision repair	Genetic Information Processing	Replication and repair	1	57	0.371798	0.670754	VIT_215s0045g00530.v2.1(VIT_215s0045g00530.v2.1)	http://www.kegg.jp/kegg-bin/show_pathway?map03420/K10756%09%23FFFFFF,red/	Genetic Information Processing_x000D_
vvi03040	Spliceosome	Genetic Information Processing	Transcription	2	162	0.37827	0.670754	VIT_205s0102g00480.v2.1(VIT_205s0102g00480.v2.1),VIT_200s0317g00100.v2.1(VIT_200s0317g00100.v2.1)	http://www.kegg.jp/kegg-bin/show_pathway?map03040/K12830%09%23FFFFFF,red/K12854%09%23FFFFFF,red/	Genetic Information Processing_x000D_
vvi03008	Ribosome biogenesis in eukaryotes	Genetic Information Processing	Translation	1	73	0.449251	0.670754	VIT_208s0007g00730.v2.1(VIT_208s0007g00730.v2.1)	http://www.kegg.jp/kegg-bin/show_pathway?map03008/K14554%09%23FFFFFF,red/	Genetic Information Processing_x000D_
vvi04141	Protein processing in endoplasmic reticulum	Genetic Information Processing	Folding, sorting and degradation	2	214	0.521563	0.670754	VIT_202s0025g00280.v2.1(VIT_202s0025g00280.v2.1),VIT_209s0002g04250.v2.1(VIT_209s0002g04250.v2.1)	http://www.kegg.jp/kegg-bin/show_pathway?map04141/K09580%09%23FFFFFF,red/K04079%09%23FFFFFF,red/	Genetic Information Processing_x000D_
vvi03013	Nucleocytoplasmic transport	Genetic Information Processing	Translation	1	96	0.544552	0.670754	VIT_208s0007g04400.v2.1(VIT_208s0007g04400.v2.1)	http://www.kegg.jp/kegg-bin/show_pathway?map03013/K18655%09%23FFFFFF,red/	Genetic Information Processing_x000D_
vvi03018	RNA degradation	Genetic Information Processing	Folding, sorting and degradation	1	99	0.555733	0.670754	VIT_203s0017g00990.v2.1(VIT_203s0017g00990.v2.1)	http://www.kegg.jp/kegg-bin/show_pathway?map03018/K12617%09%23FFFFFF,red/	Genetic Information Processing_x000D_
vvi03015	mRNA surveillance pathway	Genetic Information Processing	Translation	1	112	0.601178	0.670754	VIT_208s0007g04400.v2.1(VIT_208s0007g04400.v2.1)	http://www.kegg.jp/kegg-bin/show_pathway?map03015/K18655%09%23FFFFFF,red/	Genetic Information Processing_x000D_
vvi03010	Ribosome	Genetic Information Processing	Translation	2	276	0.662721	0.670754	VIT_205s0094g00870.v2.1(VIT_205s0094g00870.v2.1),VIT_214s0068g01950.v2.1(VIT_214s0068g01950.v2.1)	http://www.kegg.jp/kegg-bin/show_pathway?map03010/K02932%09%23FFFFFF,red/K02899%09%23FFFFFF,red/	Genetic Information Processing_x000D_
vvi04120	Ubiquitin mediated proteolysis	Genetic Information Processing	Folding, sorting and degradation	1	134	0.667992	0.670754	VIT_213s0067g01210.v2.1(VIT_213s0067g01210.v2.1)	http://www.kegg.jp/kegg-bin/show_pathway?map04120/K03348%09%23FFFFFF,red/	Genetic Information Processing_x000D_
vvi00240	Pyrimidine metabolism	Metabolism	Nucleotide metabolism	2	63	0.0910876	0.448456	VIT_201s0026g02490.v2.1(VIT_201s0026g02490.v2.1),VIT_216s0022g00980.v2.1(VIT_216s0022g00980.v2.1)	http://www.kegg.jp/kegg-bin/show_pathway?map00240/K13800%09%23FFFFFF,red/K01510%09%23FFFFFF,red/	Metabolism_x000D_
vvi00944	Flavone and flavonol biosynthesis	Metabolism	Biosynthesis of other secondary metabolites	1	12	0.0927839	0.448456	VIT_206s0009g03140.v2.1(VIT_206s0009g03140.v2.1)	http://www.kegg.jp/kegg-bin/show_pathway?map00944/K13083%09%23FFFFFF,red/	Metabolism_x000D_
vvi00650	Butanoate metabolism	Metabolism	Carbohydrate metabolism	1	21	0.156823	0.642264	VIT_203s0017g01720.v2.1(VIT_203s0017g01720.v2.1)	http://www.kegg.jp/kegg-bin/show_pathway?map00650/K16871%09%23FFFFFF,red/	Metabolism_x000D_
vvi00904	Diterpenoid biosynthesis	Metabolism	Metabolism of terpenoids and polyketides	1	24	0.177176	0.642264	VIT_207s0151g01040.v2.1(VIT_207s0151g01040.v2.1)	http://www.kegg.jp/kegg-bin/show_pathway?map00904/K04120%09%23FFFFFF,red/	Metabolism_x000D_
vvi00906	Carotenoid biosynthesis	Metabolism	Metabolism of terpenoids and polyketides	1	33	0.235411	0.670754	VIT_205s0062g01110.v2.1(VIT_205s0062g01110.v2.1)	http://www.kegg.jp/kegg-bin/show_pathway?map00906/K15744%09%23FFFFFF,red/	Metabolism_x000D_
vvi00250	Alanine, aspartate and glutamate metabolism	Metabolism	Amino acid metabolism	1	43	0.295419	0.670754	VIT_203s0017g01720.v2.1(VIT_203s0017g01720.v2.1)	http://www.kegg.jp/kegg-bin/show_pathway?map00250/K16871%09%23FFFFFF,red/	Metabolism_x000D_
vvi00330	Arginine and proline metabolism	Metabolism	Amino acid metabolism	1	53	0.350838	0.670754	VIT_203s0038g00760.v2.1(VIT_203s0038g00760.v2.1)	http://www.kegg.jp/kegg-bin/show_pathway?map00330/K01583%09%23FFFFFF,red/	Metabolism_x000D_
vvi00051	Fructose and mannose metabolism	Metabolism	Carbohydrate metabolism	1	59	0.38203	0.670754	VIT_215s0046g00110.v2.1(VIT_215s0046g00110.v2.1)	http://www.kegg.jp/kegg-bin/show_pathway?map00051/K05305%09%23FFFFFF,red/	Metabolism_x000D_
vvi00941	Flavonoid biosynthesis	Metabolism	Biosynthesis of other secondary metabolites	1	66	0.416581	0.670754	VIT_206s0009g03140.v2.1(VIT_206s0009g03140.v2.1)	http://www.kegg.jp/kegg-bin/show_pathway?map00941/K13083%09%23FFFFFF,red/	Metabolism_x000D_
vvi00230	Purine metabolism	Metabolism	Nucleotide metabolism	1	84	0.497027	0.670754	VIT_201s0026g02490.v2.1(VIT_201s0026g02490.v2.1)	http://www.kegg.jp/kegg-bin/show_pathway?map00230/K01510%09%23FFFFFF,red/	Metabolism_x000D_
vvi00270	Cysteine and methionine metabolism	Metabolism	Amino acid metabolism	1	95	0.540764	0.670754	VIT_206s0004g01080.v2.1(VIT_206s0004g01080.v2.1)	http://www.kegg.jp/kegg-bin/show_pathway?map00270/K00558%09%23FFFFFF,red/	Metabolism_x000D_
vvi00500	Starch and sucrose metabolism	Metabolism	Carbohydrate metabolism	1	114	0.607755	0.670754	VIT_218s0001g05300.v2.1(VIT_218s0001g05300.v2.1)	http://www.kegg.jp/kegg-bin/show_pathway?map00500/K01087%09%23FFFFFF,red/	Metabolism_x000D_
vvi00520	Amino sugar and nucleotide sugar metabolism	Metabolism	Carbohydrate metabolism	1	135	0.670754	0.670754	VIT_215s0046g00110.v2.1(VIT_215s0046g00110.v2.1)	http://www.kegg.jp/kegg-bin/show_pathway?map00520/K05305%09%23FFFFFF,red/	Metabolism_x000D_
vvi04626	Plant-pathogen interaction	Organismal Systems	Environmental adaptation	8	239	0.000494393	0.0143374	VIT_219s0014g05150.v2.1(VIT_219s0014g05150.v2.1),VIT_219s0014g05135.v2.1(VIT_219s0014g05135.v2.1),VIT_207s0005g06200.v2.1(VIT_207s0005g06200.v2.1),VIT_202s0025g00280.v2.1(VIT_202s0025g00280.v2.1),VIT_219s0014g00920.v2.1(VIT_219s0014g00920.v2.1),VIT_209s0002g03790.v2.1(VIT_209s0002g03790.v2.1),VIT_207s0005g06210.v2.1(VIT_207s0005g06210.v2.1),VIT_210s0116g00910.v2.1(VIT_210s0116g00910.v2.1)	http://www.kegg.jp/kegg-bin/show_pathway?map04626/K13457%09%23FFFFFF,red/K04079%09%23FFFFFF,red/K13459%09%23FFFFFF,red/K13429%09%23FFFFFF,red/	Organismal Systems_x000D_
